# Supplementary material for: Functional architecture of reward learning in mushroom body extrinsic neurons of larval Drosophila
Source: PubMed Central journal article supplement (PMC5856778; doi:10.1038/s41467-018-03130-1), 2018-03-16
Supplement: 41467_2018_3130_MOESM1_ESM.pdf [file 41467_2018_3130_MOESM1_ESM.pdf]

Table 1: Defining features of mushroom body extrinsic neurons (MBEs)

| MB compartment | Cell       | MBE class  | Cell body location       | Major presynaptic terminals @ (bold: MB compartment) | Major postsynaptic region(s) @ (bold: MB compartment)            | Interhemispheric cross talk? (with MB-to-MB connection?) | Lineage        | Transmitter | Synonym cell name | Reference                                                                |
|----------------|------------|------------|--------------------------|------------------------------------------------------|------------------------------------------------------------------|----------------------------------------------------------|----------------|-------------|-------------------|--------------------------------------------------------------------------|
| CX*            | OAN-a1     | sMBIN      | SEZ maxillary segment    | AL (c + i), CX (c + i), CPL (c + i)                  | SEZ (both hemispheres)                                           | Yes (No)                                                 | Not determined | OA/TA       | sVUMmx1           | Selcho et al. 2014                                                       |
|                | OAN-a2     | sMBIN      | SEZ mandibular segment   | AL (c + i), CX (c + i), CPL (c + i)                  | SEZ (both hemispheres)                                           | Yes (No)                                                 | Not determined | OA/TA       | sVUMmd1           | Selcho et al. 2014                                                       |
|                | MBON-a1    | sMBON      | PDM                      | CPM (c + i), CPI (c + i)                             | CX (i)                                                           | Yes (No)                                                 | CPv2/3         | ChAT        | odd               | Slater et al. 2015                                                       |
|                | MBON-a2    | sMBON      | PDM                      | CPM (c + i), CPI (c + i)                             | CX (i)                                                           | Yes (No)                                                 | CPv2/3         | ChAT        | odd               | Slater et al. 2015                                                       |
| IP             | MBIN-b1    | sMBIN      | ADL                      | <b>IP (c)</b>                                        | CPL (i), CPM (i), BPM (i)                                        | Yes (No)                                                 | DPLd           |             |                   |                                                                          |
|                | MBIN-b2    | sMBIN      | ADL                      | <b>IP (c)</b>                                        | CPL (i), CPM (i), BPM (i)                                        | Yes (No)                                                 | DPLd           |             |                   |                                                                          |
|                | MBON-b1    | sMBON      | PVL                      | CPL (i), CPI (i)                                     | <b>IP (i)</b>                                                    | No (No)                                                  | BLV a3/4       | GABA        | BL                | Pauls et al. 2010, Eichler et al. 2017                                   |
|                | MBON-b2    | sMBON      | PVL                      | CPL (i), CPI (i)                                     | <b>IP (i)</b>                                                    | No (No)                                                  | BLV a3/4       | GABA        | BL                | Pauls et al. 2010, Eichler et al. 2017                                   |
|                | MBON-b3*** | sMBON      | PVL                      | CPL (i), CPM (c + i), CPI (c + i)                    | <b>IP (i)</b>                                                    | Yes (No)                                                 | CPv2/3         |             |                   |                                                                          |
| LP             | DAN-c1     | sMBIN      | PVL                      | <b>LP (c + i)</b>                                    | DP (i), DA (i)                                                   | Yes (Yes)                                                | CPv2/3         | DA          | DL1-5             | Selcho et al. 2009, Eichler et al. 2017                                  |
|                | MBIN-c1*** | sMBIN      | PVL                      | <b>LP (c + i)</b>                                    | DP (i), DA (i)                                                   | Yes (Yes)                                                | CPv2/3         |             |                   |                                                                          |
|                | MBON-c1    | sMBON      | PDL                      | CPL (i), BPM (i), CPM (i)                            | <b>LP (i)</b>                                                    | No (No)                                                  | BLDc           | ChAT        |                   | Eichler et al. 2017                                                      |
|                | MBON-c2    | sMBON      | PDM                      | SEZ (i), TG (i)                                      | <b>LP (i)</b> , BPL (i), BPM (i)                                 | No (No)                                                  | DPM11          | DA          | DM1               | Selcho et al. 2009                                                       |
| LA             | DAN-d1     | sMBIN      | PVL                      | <b>LA (c + i)</b>                                    | DP (i), BC (i), CPM (i)                                          | Yes (Yes)                                                | CPv2/3         | DA          | DL 1-4            | Selcho et al. 2009, Eichler et al. 2017                                  |
|                | MBIN-l1    | sMBIN      | PVL                      | <b>LA (c)</b>                                        | BC (i)                                                           | Yes (No)                                                 | BLV a3/4       |             |                   |                                                                          |
|                | MBON-d1    | sMBON      | ADL                      | CPM (c + i)                                          | <b>LA (i)</b>                                                    | Yes (No)                                                 | DAL CM-1/2     | GABA        | la type           | Pauls et al. 2010, Eichler et al. 2017                                   |
|                | MBON-p1    | sMBON      | ADL                      | BPM (i)                                              | <b>LA (i)</b> , CPI (i), DP (i), DA (i)                          | No (No)                                                  | DAL CM-1/2     |             |                   |                                                                          |
|                | MBON-p2*** | sMBON      | AVM                      | CPM (i)                                              | <b>LA (i)</b>                                                    | No (No)                                                  | BAm2           |             |                   |                                                                          |
| UVL            | OAN-e1     | sMBIN      | PVL                      | <b>UVL (i)</b>                                       | DA (i), DP (i)                                                   | No (No)                                                  | CPv2/3         | OA          |                   | Eichler et al. 2017                                                      |
|                | MBIN-e2    | sMBIN      | PVL                      | <b>UVL (c + i)</b>                                   | DA (i), DP (i)                                                   | Yes (Yes)                                                | CPv2/3         | DA7         | vl 3 type, DL1-1  | Pauls et al. 2010, Selcho et al. 2009 - but see also Eichler et al. 2017 |
| IVL            | MBON-e1    | sMBON      | PVL                      | DA (i), DP (i)                                       | <b>UVL (i)</b>                                                   | No (No)                                                  | CPv2/3         | ChAT        |                   | Eichler et al. 2017                                                      |
|                | DAN-f1     | sMBIN      | PVL                      | <b>IVL (c + i)</b>                                   | DA (i), DP (i), CPL (i)                                          | Yes (Yes)                                                | CPv2/3         | DA          | vl 2 type, DL 1-2 | Pauls et al. 2010, Selcho et al. 2009, Eichler et al. 2017               |
|                | MBON-f2    | sMBON      | ADL                      | BC (c + i)                                           | <b>IVL (i)</b>                                                   | Yes (No)                                                 | DAL c12        |             |                   |                                                                          |
| LVL            | MBON-f1*** | sMBON      | PVL                      | SEZ (c + i)                                          | <b>IVL (i)</b> , DA (i), DP (i), CPL (i)                         | Yes (No)                                                 | Cpd            |             |                   |                                                                          |
|                | DAN-g1     | sMBIN      | PVL                      | <b>LVL (c)</b> , CA (c), CPI (c)                     | DA (i), BC (i), DP (i)                                           | Yes (No)                                                 | CPv2/3         | DA          | DL 1-3            | Selcho et al. 2009, Eichler et al. 2017                                  |
|                | OAN-g1     | sMBIN      | SEZ maxillary segment    | <b>IVL (c)</b> , DA (c), DP (c), CPL (c)             | SEZ (c + i)                                                      | Yes (No)                                                 | Not determined | OA/TA       | sVPMmx            | Selcho et al. 2014                                                       |
|                | MBON-g1    | sMBON      | AVL                      | CPM (i)                                              | <b>LVL (i)</b>                                                   | No (No)                                                  | DAL V 2/3      | GABA        | v1 type           | Pauls et al. 2010, Eichler et al. 2017                                   |
| SHA            | MBON-g2    | sMBON      | AVL                      | CPM (i)                                              | <b>LVL (i)</b>                                                   | No (No)                                                  | DAL V 2/3      | GABA        | v1 type           | Pauls et al. 2010, Eichler et al. 2017                                   |
|                | DAN-h1     | sMBIN      | ADL                      | <b>SHA (c + i)</b>                                   | DA (i), DP (i)                                                   | Yes (Yes)                                                | DAL CM-1/2     | DA          | pPAM1             | Rohwedder et al. 2016                                                    |
|                | MBON-h1    | sMBON      | AVL                      | CPM (c + i)                                          | <b>SHA (c + i)</b>                                               | Yes (Yes)                                                | DAL V 2/3      | GABA/GLUT   | APBL              | Pauls et al. 2010, Eichler et al. 2017                                   |
|                | MBON-h2    | sMBON      | AVL                      | CPM (c + i)                                          | <b>SHA (c + i)</b>                                               | Yes (Yes)                                                | DAL V 2/3      | GABA/GLUT   | APBL              | Pauls et al. 2010, Eichler et al. 2017                                   |
| UT             | DAN-i1     | sMBIN      | ADL                      | <b>UT (c + i)</b>                                    | DA (i), DP (i)                                                   | Yes (Yes)                                                | DAL CM-1/2     | DA          | pPAM3             | Rohwedder et al. 2016, Eichler et al. 2017                               |
|                | MBON-i1    | sMBON      | ADM                      | DA (c + i), CPM (c + i)                              | <b>UT (c + i)</b>                                                | Yes (Yes)                                                | DAM-d1         | GLUT        |                   | Eichler et al. 2017                                                      |
| IT             | DAN-j1     | sMBIN      | ADL                      | <b>IT (c + i)</b>                                    | DA (i), DP (i)                                                   | Yes (Yes)                                                | DAL CM-1/2     | DA          | pPAM4             | Rohwedder et al. 2016, Eichler et al. 2017                               |
|                | MBON-j1    | sMBON      | ADM                      | DA (i), DP (i), CPL (i)                              | <b>IT (c + i)</b>                                                | Yes (Yes)                                                | DAM-d1         | GLUT        |                   | Eichler et al. 2017                                                      |
|                | MBON-j2    | sMBON      | ADL                      | DA (c), DP (c), CPL (c)                              | <b>IT (i)</b>                                                    | Yes (No)                                                 | DAL CM-1/2     | GLUT        |                   | This study, Figure S21                                                   |
| LT             | DAN-k1     | sMBIN      | ADL                      | <b>LT (c + i)</b>                                    | DA (i), DP (i), BC (i)                                           | Yes (Yes)                                                | DAL CM-1/2     | DA          | ma type, pPAM2    | Pauls et al. 2010, Rohwedder et al. 2016, Eichler et al. 2017            |
|                | MBON-k1    | sMBON      | ADM                      | DA (c + i)                                           | <b>LT (c + i)</b>                                                | Yes (Yes)                                                | DAM-d1         | GLUT        |                   | Eichler et al. 2017                                                      |
| ML             | MBIN-m1    | mMBIN      | PVL                      | <b>ML**** (c + i), IVL</b>                           | DA (i)                                                           | Yes (Yes)                                                | CPv2/3         |             |                   |                                                                          |
|                | APL        | mMBIN/MBON | AVL                      | <b>CX (i)</b>                                        | <b>UT (i), LT (i), UVL (i), IVL (i), LVL (i), LA (i), DA (i)</b> | No (No)                                                  | BLV a3/4       | GABA        | Larval APL        | Masuda-Nakagawa et al. 2014, Eichler et al. 2017                         |
|                | MBON-e2    | mMBON      | ADM                      | CPM (c + i), CPI (c + i)                             | <b>UVL (i), IVL (i), LVL (i)</b>                                 | Yes (No)                                                 | DAM-d1         | GLUT        |                   | Eichler et al. 2017                                                      |
|                | MBON-m1    | mMBON      | ADL                      | BC (c), BPM (c)                                      | <b>IVL (i), LVL (i), LA (i), DA (i)</b>                          | Yes (No)                                                 | DAL CM-1/2     | GABA        |                   | Eichler et al. 2017                                                      |
|                | MBON-n1    | mMBON      | AVM                      | DA (i), BC (i)                                       | <b>UVL (i), IVL (i), LVL (i), DA (i), DP (i), BC (i)</b>         | No (No)                                                  | BA md1         |             |                   |                                                                          |
| MBON-d3        | mMBON      | ADM        | CPI (c + i), CPM (c + i) | <b>UVL (c + i), IVL (c + i)</b>                      | Yes (Yes)                                                        | DAM-d1                                                   |                |             |                   |                                                                          |

MB compartments and MBE class

|      |                                           |
|------|-------------------------------------------|
| CX   | Calyx                                     |
| IP   | Intermediate peduncle                     |
| LP   | Lower peduncle (spur**)                   |
| LA   | Lateral appendix                          |
| UVL  | Upper vertical lobe                       |
| IVL  | Intermediate vertical lobe                |
| LVL  | Lower vertical lobe                       |
| SHA  | Shaft of medial lobe                      |
| UT   | Upper toe of medial lobe                  |
| IT   | Intermediate toe of medial lobe           |
| LT   | Lower toe of medial lobe                  |
| ML   | Medial lobe                               |
| VL   | Vertical lobe                             |
| sMBE | MBE with single-compartment innervation   |
| mMBE | MBE with multiple-compartment innervation |

Orientation for cell body location

|    |           |
|----|-----------|
| A: | anterior  |
| P: | posterior |
| V: | ventral   |
| D: | dorsal    |
| L: | lateral   |
| M: | medial    |

Neuropils/nervous system compartments

|     |                                                          |
|-----|----------------------------------------------------------|
| AL  | antennal lobe (BA****)                                   |
| SEZ | subesophageal zone (sbg****)                             |
| CPM | centroposterior medial compartment                       |
| CPI | centroposterior intermediate compartment                 |
| CPL | centroposterior lateral compartment                      |
| BA  | basoanterior compartment                                 |
| BPM | basoposterior medial compartment                         |
| DA  | dorsoanterior compartment                                |
| DP  | dorsoposterior compartment                               |
| BC  | basocentral compartment                                  |
| CA  | centroanterior compartment                               |
| CPI | centroposterior intermediate compartment                 |
| TG  | thoracic ganglion                                        |
| BPL | basoposterior lateral compartment                        |
| i   | ipsilateral projection, relative to cell body location   |
| c   | contralateral projection, relative to cell body location |

\*Ascending sensory interneurons, such as the olfactory PNs, are not included  
 \*\*Synonym according to Selcho et al. 2009  
 \*\*\*Not included in behavioral screen  
 \*\*\*\*Synonym according to Younossi-Hartenstein et al. 2003  
 \*\*\*\*\*Innervated compartments within ML cannot be clearly discerned

Table 2: Matrix of which Gal4 driver strain(s) include(s) which MBE neuron

| MBE neuron... | ... covered in driver strain(s)                                                                                        |
|---------------|------------------------------------------------------------------------------------------------------------------------|
| OAN-a1        | R34A11                                                                                                                 |
| OAN-a2        | R34A11                                                                                                                 |
| MBON-a1       | R28A09, R36G04, R37D06, R47C08, R52E12, R64F07, R93G12                                                                 |
| MBON-a2       | R28A09, R36G04, R37D06, R47C08, R52E12, R64F07, R93G12                                                                 |
| MBIN-b1       | R14B11, R64E03, R78G08                                                                                                 |
| MBIN-b2       | R14B11, R64E03, R78G08                                                                                                 |
| MBON-b1       | R12C03, R20H11, R21D02, R22A08, R27F02, R86A06                                                                         |
| MBON-b2       | R12C03, R20H11, R21D02, R22A08, R27F02, R86A06                                                                         |
| MBON-b3       | R30E10*, VT17749*                                                                                                      |
| DAN-c1        | R30E11, R30G04, R64E03, R76C04, R95H02                                                                                 |
| MBIN-c1       | R64E03, R72G06*                                                                                                        |
| MBON-c1       | R20F01, R74B11, R92H01, R94E06                                                                                         |
| MBON-c2       | R12C11                                                                                                                 |
| DAN-d1        | R21D02, R22A08, R22H04, R30E08, R30F04, R38E08, R64E03, R76C04, R78E04                                                 |
| MBIN-i1       | R12C03, R20B12, R20C09, R21A06, R47C08, R47H03, R48D11, R48F09, R52H01, R58F03, R95A11                                 |
| MBON-d1       | R14B11, R20F01, R37G09, R49C08, R84D07                                                                                 |
| MBON-p1       | R15D04, R17B02                                                                                                         |
| MBON-d2       | R54A09*, R87G02*, R89B06*, VT32899*                                                                                    |
| OAN-e1        | R24A12, R28A12, R46F09*, R49D11*, R52G03, R64E03, R75F01*                                                              |
| MBIN-e2       | R12C03, R14E06, R64E03, R72B05                                                                                         |
| MBON-e1       | R74B11                                                                                                                 |
| DAN-f1        | R10B07, R21D02, R37D06, R64E03, R76F05, R95H02                                                                         |
| MBON-f2       | R10B07, R36B06, R42F08, R64A11                                                                                         |
| MBON-f1       | R48E11*                                                                                                                |
| DAN-g1        | R10D02, R14E06, R21D02, R27F02, R30E11, R64E03                                                                         |
| OAN-g1        | R30D03                                                                                                                 |
| MBON-g1       | R11F03, R21D06, R21D08, R23B09, R48G01, R67E07, R94E06                                                                 |
| MBON-g2       | R11F03, R21D06, R21D08, R23B09, R48G01, R67E07, R94E06                                                                 |
| DAN-h1        | R26G04, R30G08, R58E02, R64E03, R64H06, R76F05, R95H02                                                                 |
| MBON-h1       | R11C10, R11F03, R22B05, R28A10, R28F06, R32D04, R50A04, R67B01, R67E07, R74A06                                         |
| MBON-h2       | R11C10, R11F03, R22B05, R28A10, R28F06, R32D04, R50A04, R67B01, R67E07, R74A06                                         |
| DAN-i1        | R21D02, R30G08, R31C03, R48F09, R49C08, R56H09, R58E02, R64E03, R64H06, R76F05, R95H02                                 |
| MBON-i1       | R14C08, R15F05, R20C05, R20H11, R21C08, R21D02, R21D07, R28A12, R46E11, R53G11, R59C07, R64E01, R65A05, R65E10, R74A06 |
| DAN-j1        | R49C08, R58E02, R64E03, R64H06, R76F05                                                                                 |
| MBON-j1       | R11F03, R12C11, R20H11, R21C08, R23B09, R33D07, R46E11, R74C01                                                         |
| MBON-j2       | R24E12, R36B06, R54H12, R89G07                                                                                         |
| DAN-k1        | R20H11, R21D02, R27A11, R30G08, R48F09, R64E03, R64H06, R71D01, R76F05                                                 |
| MBON-k1       | R20H11, R21D02, R65A05, R74A06                                                                                         |
| MBIN-m1       | R76F05                                                                                                                 |
| APL           | R20H11, R21D02, R26G02, R55D08                                                                                         |
| MBON-e2       | R12C11, R28A12, R43A02, R65A05                                                                                         |
| MBON-m1       | R20B12, R24D12, R52H01                                                                                                 |
| MBON-n1       | R22B05, R29E04, R83G11                                                                                                 |
| MBON-d3       | R11F03, R12C11                                                                                                         |

\*Not included in behavioral screen

Table 3: Matrix of which MBE neuron(s) are included in which Gal4 driver strain(s)

| Driver strain... | Stock Number | ... covering MBE neuron(s)                                                | Driver strain... | Stock Number | ... covering MBE neuron(s)                                                                           |
|------------------|--------------|---------------------------------------------------------------------------|------------------|--------------|------------------------------------------------------------------------------------------------------|
| R10B07           | 48244        | DAN-f1, MBON-f2                                                           | R43A02           | 41256        | MBON-e2                                                                                              |
| R10D02           | 48437        | DAN-g1                                                                    | R46E11           | 50272        | MBON-f1, MBON-f11                                                                                    |
| R11C10           | 48450        | MBON-h1,h2                                                                | R46F09*          | 50275        | OAN-e1                                                                                               |
| R11F03           | 48464        | MBON-j1, MBON-h1,h2, MBON-g1,g2, MBON-d3                                  | R47C08           | 50298        | MBIN-f1, MBON-a1,a2                                                                                  |
| R12C03           | 45024        | MBIN-h1, MBON-b1,b2, MBIN-e2                                              | R47H03           | 50331        | MBIN-f1                                                                                              |
| R12C11           | 48497        | MBON-j1, MBON-e2, MBON-c2, MBON-d3                                        | R48D11           | 50365        | MBIN-f1                                                                                              |
| R14B11           | 49255        | MBIN-b1,b2, MBON-d1                                                       | R48E11*          | 50372        | MBON-f1                                                                                              |
| R14C08           | 48606        | MBON-i1                                                                   | R48F09           | 50377        | DAN-k1, DAN-l1, MBIN-f1                                                                              |
| R14E06           | 48643        | DAN-g1, MBIN-e2                                                           | R48G01           | 50381        | MBON-g1,g2                                                                                           |
| R15D04           | n.a.         | MBON-p1                                                                   | R49C08           | 50418        | DAN-l1, DAN-j1, MBON-d1                                                                              |
| R15F05           | 48699        | MBON-i1                                                                   | R49D11*          | 38684        | OAN-e1                                                                                               |
| R17B02           | 48754        | MBON-p1                                                                   | R50A04           | 38720        | MBON-h1,h2                                                                                           |
| R20B12           | 48880        | MBIN-f1, MBON-m1                                                          | R52E12           | 38837        | MBON-a1,a2                                                                                           |
| R20C05           | 48883        | MBON-i1                                                                   | R52G03           | 38842        | OAN-e1                                                                                               |
| R20C09           | 48886        | MBIN-f1                                                                   | R52H01           | 47638        | MBIN-f1, MBON-m1                                                                                     |
| R20F01           | 48610        | MBON-c1, MBON-d1                                                          | R53G11           | 50449        | MBON-f1                                                                                              |
| R20H11           | 48918        | DAN-k1, MBON-j1, MBON-i1, MBON-k1, MBON-b1,b2, APL                        | R54A09*          | 50480        | MBON-d2                                                                                              |
| R21A06           | n.a.         | MBIN-l1                                                                   | R54H12           | 48205        | MBON-j2                                                                                              |
| R21C08           | 48935        | MBON-j1, MBON-i1                                                          | R55D08           | 39115        | APL                                                                                                  |
| R21D02           | 48939        | DAN-k1, DAN-l1, DAN-f1, DAN-g1, DAN-d1, MBON-l1, MBON-k1, MBON-b1,b2, APL | R56H09           | 39166        | DAN-l1                                                                                               |
| R21D06           | 48942        | MBON-g1,g2                                                                | R58E02           | 41347        | DAN-h1, DAN-i1, DAN-j1                                                                               |
| R21D07           | 48943        | MBON-i1                                                                   | R58F03           | 39187        | MBIN-f1                                                                                              |
| R21D08           | 48944        | MBON-g1,g2                                                                | R59C07           | 48217        | MBON-f1                                                                                              |
| R22A08           | 47902        | DAN-d1, MBON-b1,b2                                                        | R54A11           | 39289        | MBON-f2                                                                                              |
| R22B05           | 48300        | MBON-h1,h2, MBON-m1                                                       | R64E01           | 48230        | MBON-i1                                                                                              |
| R22H04           | n.a.         | DAN-d1                                                                    | R64E03           | 41351        | DAN-h1, DAN-k1, DAN-l1, DAN-j1, DAN-f1, DAN-g1, DAN-c1, MBIN-c1, DAN-d1, OAN-e1, MBIN-b1,b2, MBIN-e2 |
| R23B09           | 49018        | MBON-j1, MBON-g1,g2                                                       | R64F07           | 39311        | MBON-a1,a2                                                                                           |
| R24A12           | 49061        | OAN-e1                                                                    | R64H06           | 49608        | DAN-h1, DAN-k1, DAN-l1, DAN-j1                                                                       |
| R24D12           | 49080        | MBON-m1                                                                   | R65A05           | 39329        | MBON-f1, MBON-k1, MBON-e2                                                                            |
| R24E12           | 49084        | MBON-j2                                                                   | R65E10           | 39359        | MBON-i1                                                                                              |
| R26G02           | 48065        | APL                                                                       | R67B01           | 39961        | MBON-h1,h2                                                                                           |
| R26G04           | n.a.         | DAN-h1                                                                    | R67E07           | 39444        | MBON-h1,h2, MBON-g1,g2                                                                               |
| R27A11           | 47908        | DAN-k1                                                                    | R71D01           | 39579        | DAN-k1                                                                                               |
| R27F02           | 48072        | DAN-g1, MBON-b1,b2                                                        | R72B05           | 39611        | MBIN-e2                                                                                              |
| R28A09           | 49445        | MBON-a1,a2                                                                | R72G06*          | 39732        | MBIN-c1                                                                                              |
| R28A10           | 48074        | MBON-h1,h2                                                                | R74A06           | 47398        | MBON-f1, MBON-k1, MBON-h1,h2                                                                         |
| R28A12           | 47909        | MBON-i1, OAN-e1, MBON-e2                                                  | R74B11           | 41301        | MBON-e1, MBON-c1                                                                                     |
| R28F06           | 48083        | MBON-h1,h2                                                                | R74C01           | 39845        | MBON-j1                                                                                              |
| R29E04           | 49486        | MBON-n1                                                                   | R75F01*          | 41304        | OAN-e1                                                                                               |
| R30D03           | 49532        | OAN-g1                                                                    | R76C04           | 48621        | DAN-c1, DAN-d1                                                                                       |
| R30E06           | 48099        | DAN-d1                                                                    | R76F05           | 41305        | DAN-h1, DAN-k1, DAN-l1, DAN-j1, MBIN-m1                                                              |
| R30E10*          | 49538        | MBON-k3                                                                   | R78E04           | 39997        | DAN-d1                                                                                               |
| R30E11           | 48100        | DAN-g1, DAN-c1                                                            | R78G08           | n.a.         | MBIN-b1,b2                                                                                           |
| R30F04           | 48614        | DAN-d1                                                                    | R83G11           | 46764        | MBON-n1                                                                                              |
| R30G04           | n.a.         | DAN-c1                                                                    | R84D07           | 40391        | MBON-d1                                                                                              |
| R30G08           | 48101        | DAN-h1, DAN-k1, DAN-l1                                                    | R86A06           | n.a.         | MBON-b1,b2                                                                                           |
| R31C03           | 48103        | DAN-l1                                                                    | R87G02*          | 40500        | MBON-d2                                                                                              |
| R32D04           | 49711        | MBON-h1,h2                                                                | R89B06*          | 40543        | MBON-d2                                                                                              |
| R33D07           | 49893        | MBON-j1                                                                   | R89G07           | 41385        | MBON-j2                                                                                              |
| R34A11           | 49767        | OAN-a1,b                                                                  | R92H01           | 40631        | MBON-c1                                                                                              |
| R36B06           | 49929        | MBON-j2, MBON-f2                                                          | R93G12           | 40667        | MBON-a1,a2                                                                                           |
| R36G04           | 49940        | MBON-a1,a2                                                                | R94E06           | 40687        | MBON-g1,g2, MBON-c1                                                                                  |
| R37D06           | 47921        | DAN-f1, MBON-a1,a2                                                        | R95A11           | 48834        | MBIN-f1                                                                                              |
| R37G09           | 49538        | MBON-d1                                                                   | R95H02           | 40716        | DAN-h1, DAN-l1, DAN-f1, DAN-c1                                                                       |
| R38E08           | 50008        | DAN-d1                                                                    | VT17749*         | 200702**     | MBON-k3                                                                                              |
| R42F08           | 50164        | MBON-f2                                                                   | VT32899*         | 203529**     | MBON-d2                                                                                              |

\* Not included in behavioral screen  
 \*\* Available from Vienna Drosophila Resource Center  
 n.a. No longer available from Bloomington Stock Centre

Table 4: List of split-Gal4 intersection strains, their source strains, and the MBE neuron(s) covered

| MBE         | Classification* | ADsource strain | DBDsource strain | Strain      |
|-------------|-----------------|-----------------|------------------|-------------|
| DAN-g1      | AA              | R14E06_R27G01   |                  | GMR_SS01716 |
| MBON-g1, g2 | AA              | R21D06_R23B09   |                  | GMR_SS02121 |
| DAN-h1      | AAA             | R76F05_R95H02   |                  | GMR_SS01696 |
| MBON-h1, h2 | AAA             | R20A02_R28A10   |                  | GMR_SS01725 |
| MBON-h1, h2 | AAA             | R20A02_R28A10   |                  | GMR_SS00928 |
| DAN-i1      | AA              | R13D05_R36B06   |                  | GMR_SS00864 |
| MBON-i1     | AAA             | R15B01_R14C08   |                  | GMR_MB141B  |
| MBON-j1     | AAA             | VT057469_R18D09 |                  | GMR_SS01973 |
| MBON-j2     | AAA             | R89G07_R24E12   |                  | GMR_SS00860 |
| DAN-k1      | AAA             | R48F09_R27A11   |                  | GMR_SS01757 |
| MBON-k1     | AAA             | VT033301_R27G01 |                  | GMR_SS01962 |
| APL         | AAA             | R21D02_R55D08   |                  | GMR_SS01671 |

\*AAA: High Expression strength, reliability, specificity

AA: Occasional, unilateral, or weak expression in other MBEs, likely without systematic effect in *en mass* behavioral assays

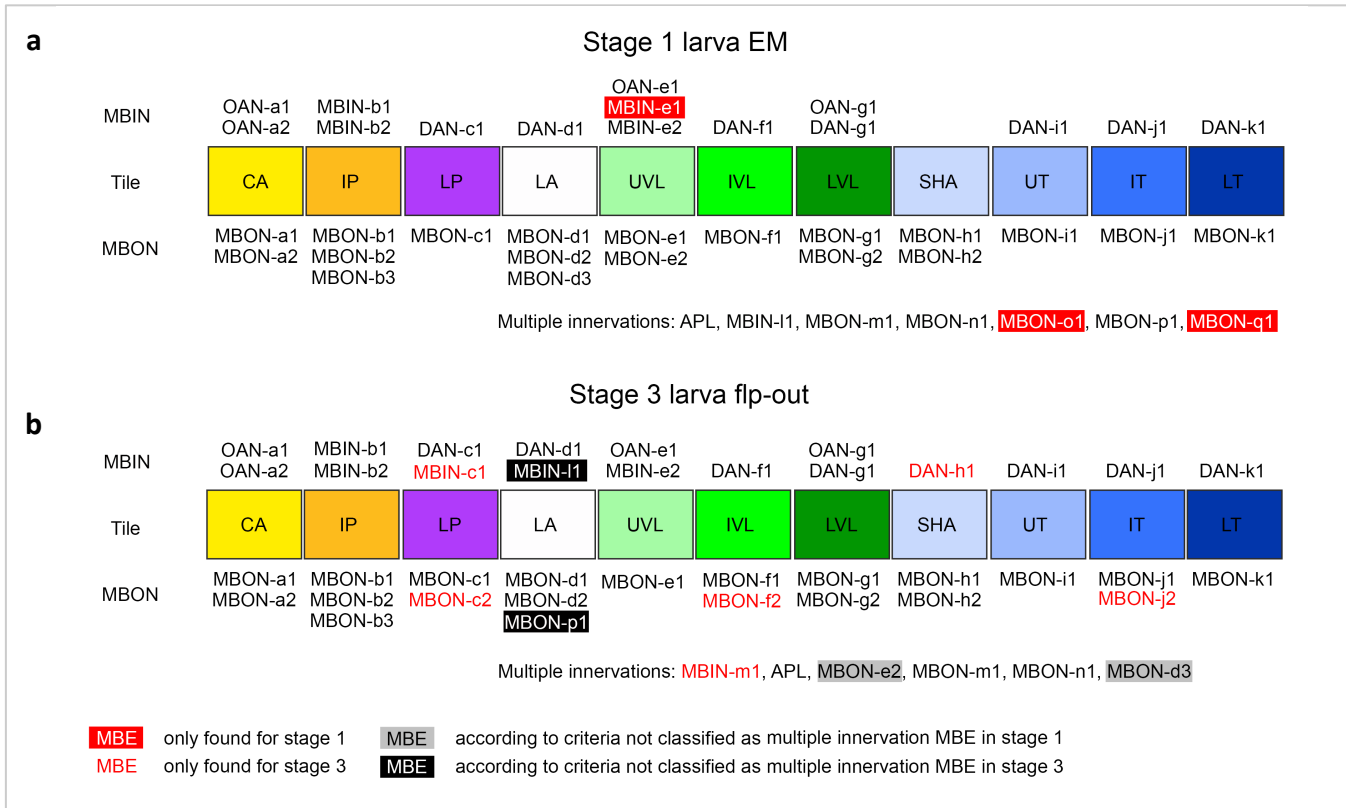

*Supplementary Figure 1: Schematic organization of MBE neurons identified in stage 1 and stage 3 larvae*

For both developmental stages (stage 1 in a; stage 3 in b) the compartmental organization of mushroom body extrinsic neurons (MBEs) is presented. Mushroom body input neurons (MBINs) and mushroom body output neurons (MBONs) are listed above and below each tile. MBEs that innervate multiple tiles are shown at the bottom. For stage 1 this is based on the electron microscopy reconstructions of (1), for stage 3 on light microscopy brain scans of flip-out experiments. In both developmental stages, 11 tiles can be recognized: calyx (CA); intermediate (IP) and lower peduncle (LP); lateral appendix (LA); upper (UVL), intermediate (IVL) and lower vertical lobe (LVL); the shaft (SHA), lower (LT), intermediate (IT) and upper toe (UT). Three MBEs were specifically found for stage 1 (MBIN-e1, MBON-o1 and MBON-q1; highlighted by red boxes) and six MBEs seem to be particular to stage 3 (MBIN-c1, DAN-h1, MBON-c2, MBON-f2, MBON-j2 and MBIN-m1; highlighted in red lettering).

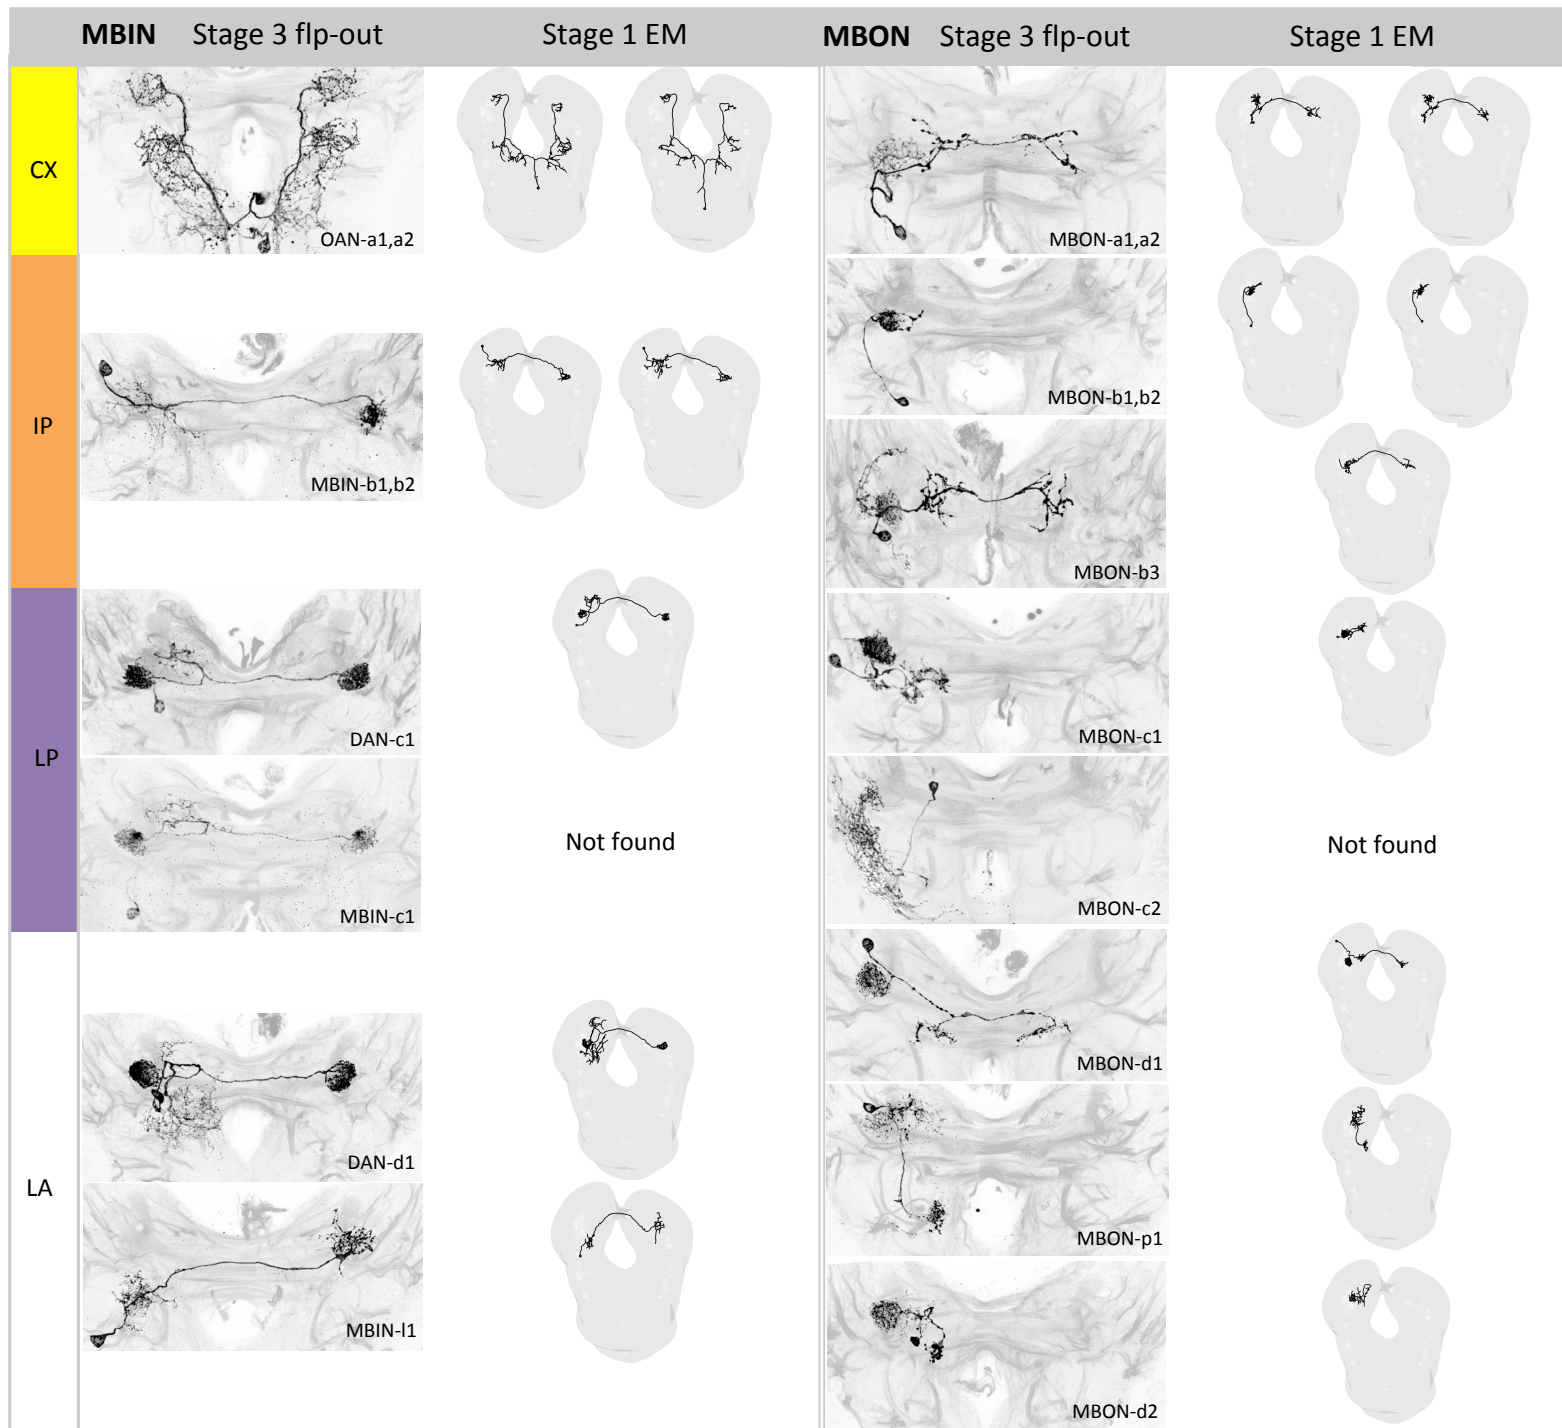

Supplementary Figure 2, ctd.

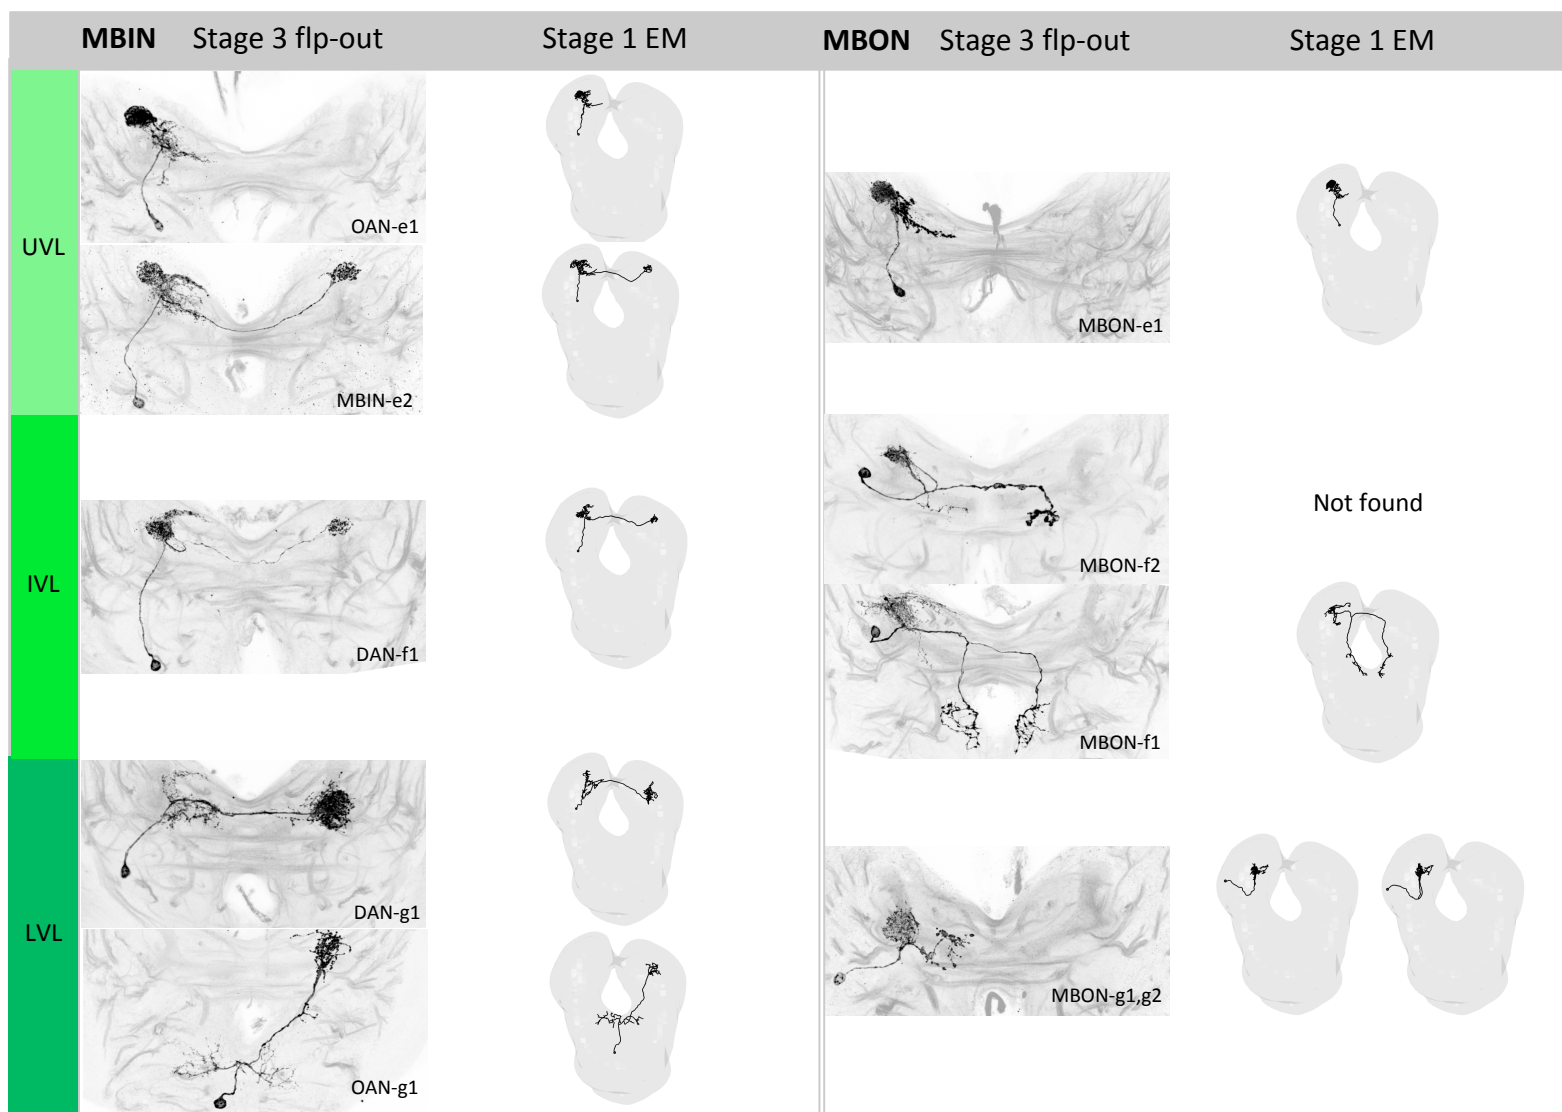

Ctd. Supplementary Figure 2

|     | MBIN | Stage 3 flp-out                                                                          | Stage 1 EM                                                                        | MBON | Stage 3 flp-out                                                                              | Stage 1 EM                                                                          |
|-----|------|------------------------------------------------------------------------------------------|-----------------------------------------------------------------------------------|------|----------------------------------------------------------------------------------------------|-------------------------------------------------------------------------------------|
| SHA |      | 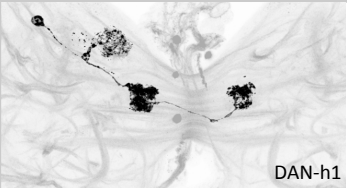 DAN-h1  | Not found                                                                         |      |  MBON-h1,h2 |   |
| UT  |      |  DAN-i1 |  |      |  MBON-i1   |  |
| IT  |      |  DAN-j1 |  |      |  MBON-j1   |  |
| LT  |      |  DAN-k1 |  |      |  MBON-k1   | Not found                                                                           |

Ctd. Supplementary Figure 2



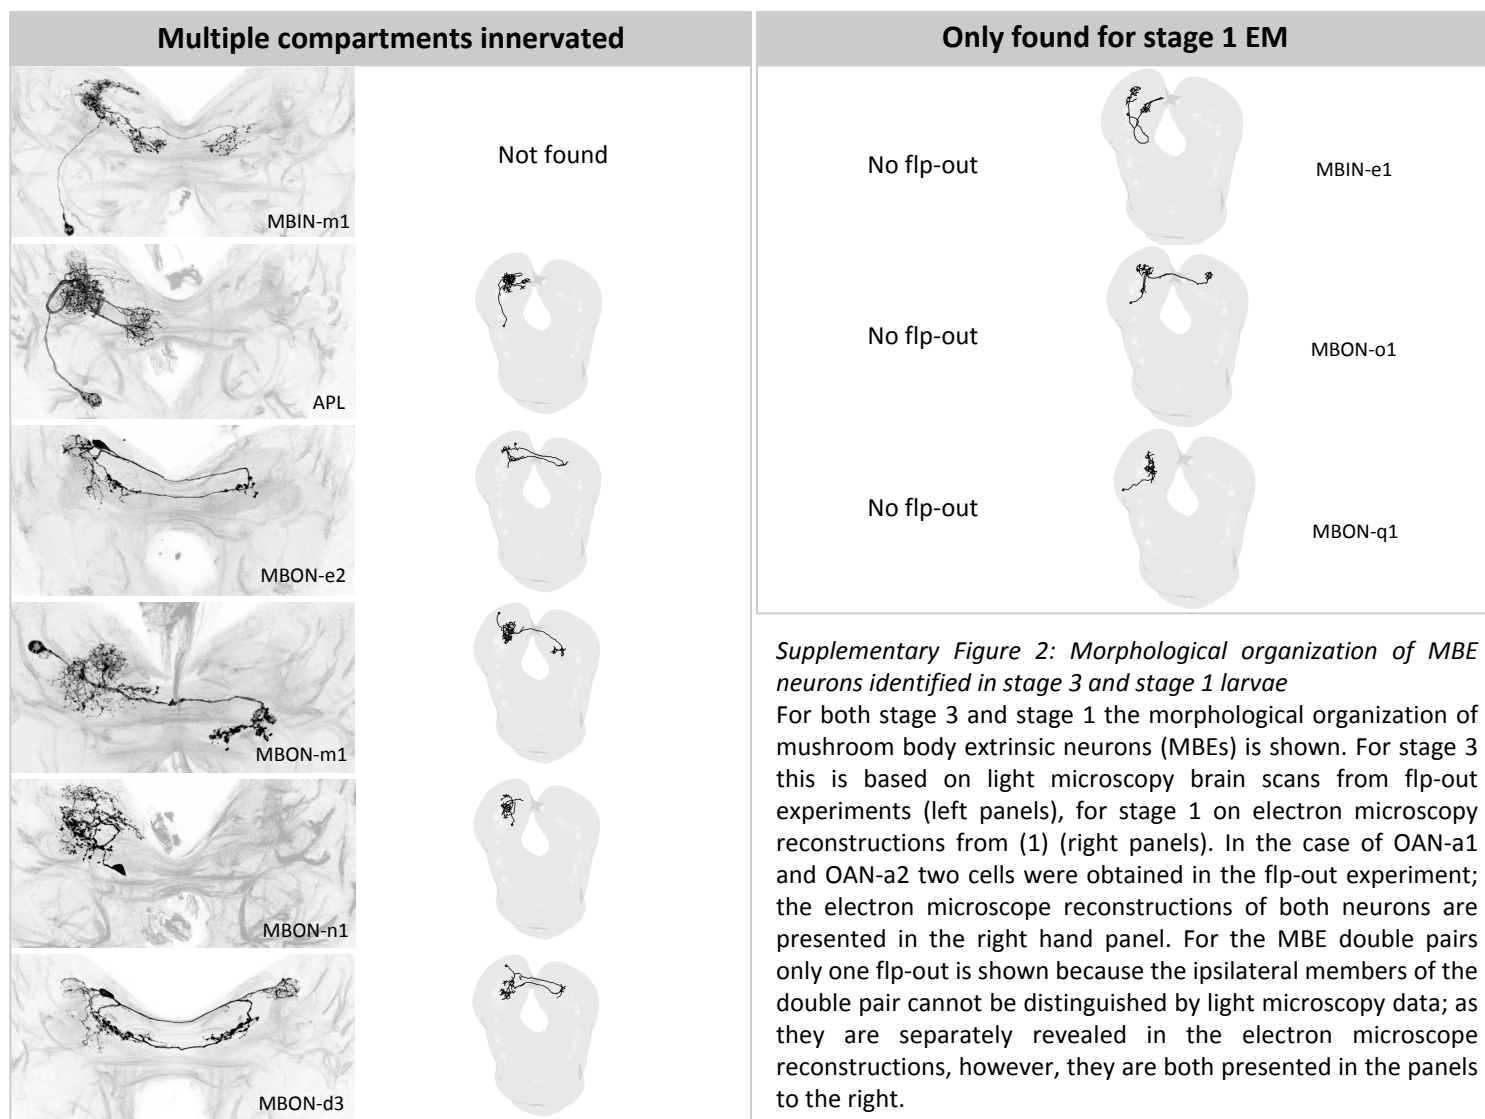

*Supplementary Figure 2: Morphological organization of MBE neurons identified in stage 3 and stage 1 larvae*

For both stage 3 and stage 1 the morphological organization of mushroom body extrinsic neurons (MBEs) is shown. For stage 3 this is based on light microscopy brain scans from flp-out experiments (left panels), for stage 1 on electron microscopy reconstructions from (1) (right panels). In the case of OAN-a1 and OAN-a2 two cells were obtained in the flp-out experiment; the electron microscope reconstructions of both neurons are presented in the right hand panel. For the MBE double pairs only one flp-out is shown because the ipsilateral members of the double pair cannot be distinguished by light microscopy data; as they are separately revealed in the electron microscope reconstructions, however, they are both presented in the panels to the right.

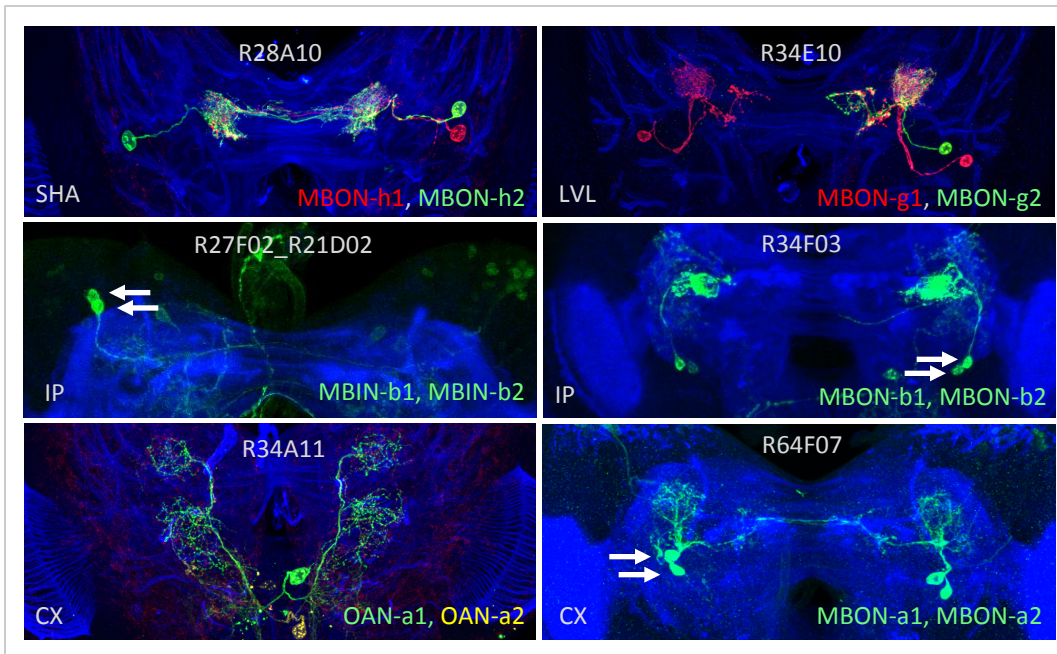

*Supplementary Figure 3: MBE neuron (double) pairs and MBE symmetry*

In all but in the bottom left case, flip-outs from MBE double pairs are presented, showing strongly overlapping innervation patterns of the ipsilateral neurons of the double pair. In all but the bottom left and middle left panels, the flip-outs of three or respectively four members of the double pair within the same brain directly reveal that MBE neurons are 'paired', i.e. are present in both hemispheres, and that the paired neurons in both hemispheres have symmetrical morphology. In the other cases, the paired nature of the MBEs and their symmetry was ascertained through independent flip-outs across brains, as well as from electron microscope reconstruction (1). The bottom left panel shows the segmentally homologous OAN-a1 and OAN-a2 neurons. Each panel shows a z-projection of the region of larval brain including the indicated MBEs. Anti-neuroglian staining (blue) provides a label for the brain. Individual neurons are shown as multi-color flip-outs in red, yellow and green depending on the expressed markers. Information about the Gal4 or split-Gal4 driver strain is given at the top of each panel. The identity of the MBEs and information about the innervated compartment is indicated within each panel. Arrows point to MBE cell bodies.

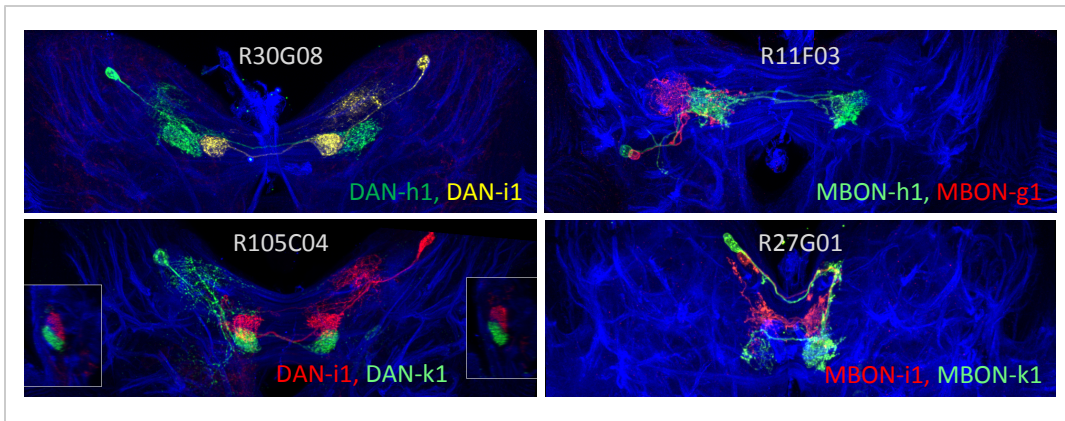

*Supplementary Figure 4: MBE neurons cover compartments in a non-overlapping way*

Four examples of double flp-out events of MBE neurons that innervate neighboring compartments, showing their non-overlap. Each panel shows a z-projection of the larval brain region including the indicated MBEs. Anti-neuroglial staining (blue) provides a label for the brain. Individual neurons are shown as multi-color flp-outs in red, yellow and green depending on the expressed markers. Information about the Gal4 and split-Gal4 driver strain and the identity of the MBEs is given within each panel. For DAN-i1 and DAN-k1 the insets show a sagittal view of medial lobe innervation.

1

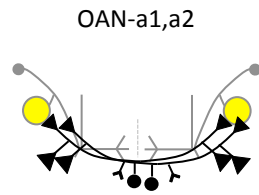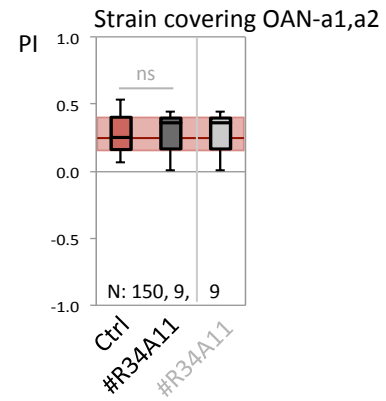

2

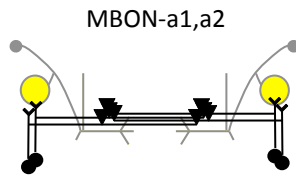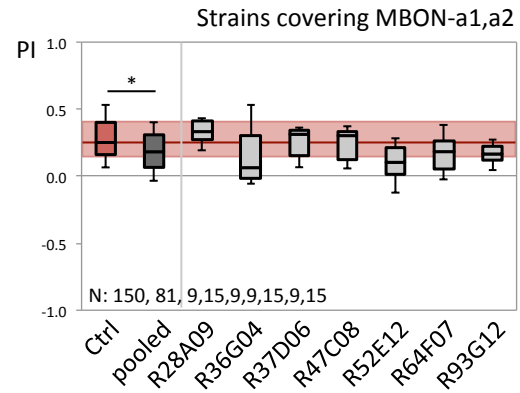

3

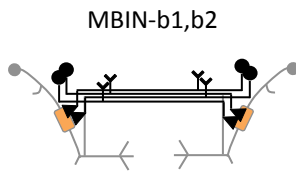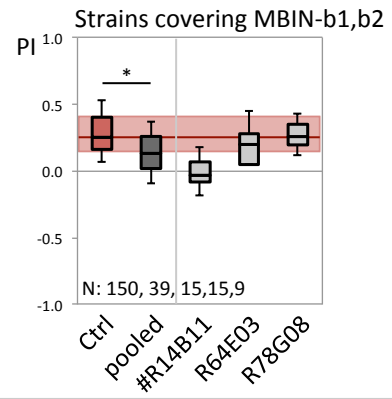

4

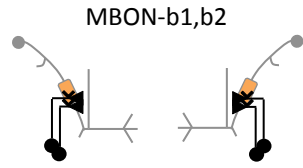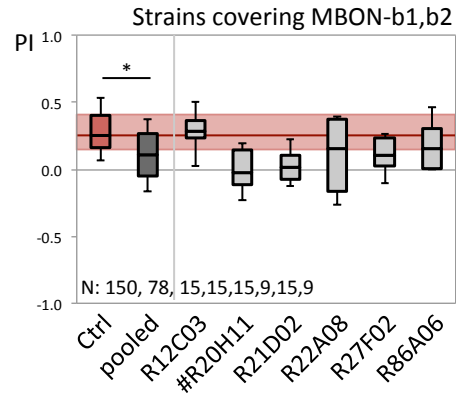

5

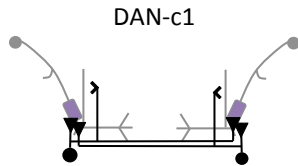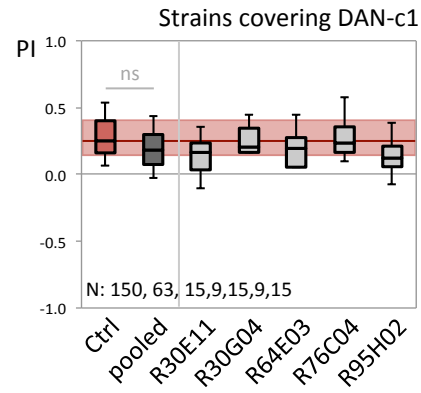

6

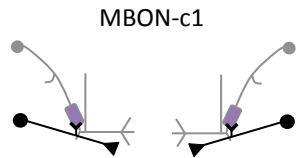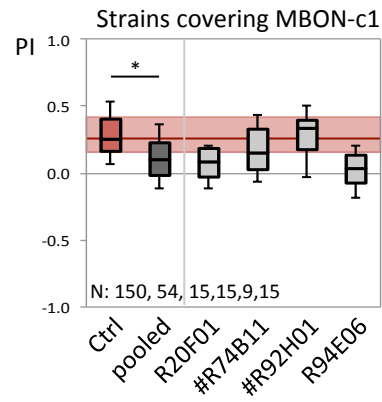

7

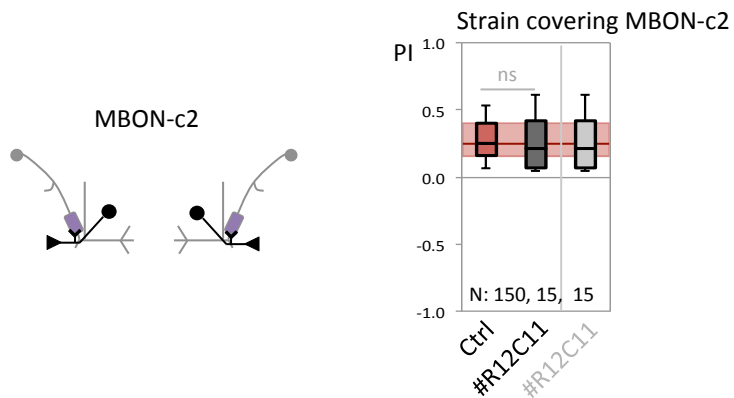

8

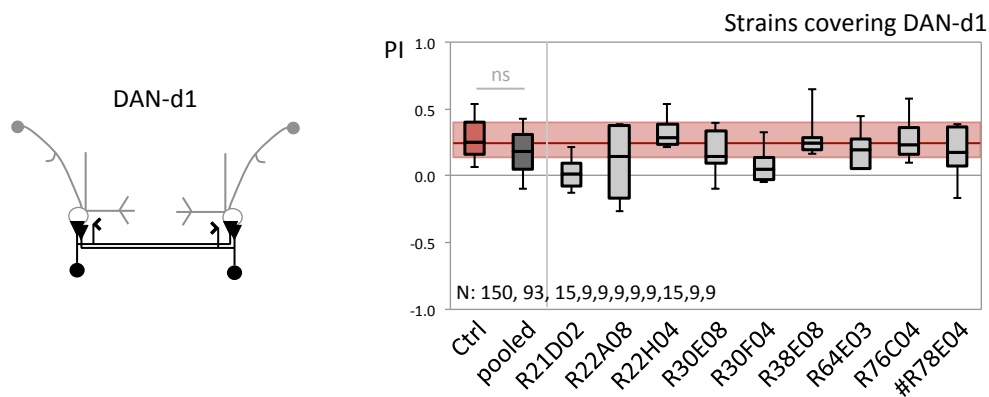

9

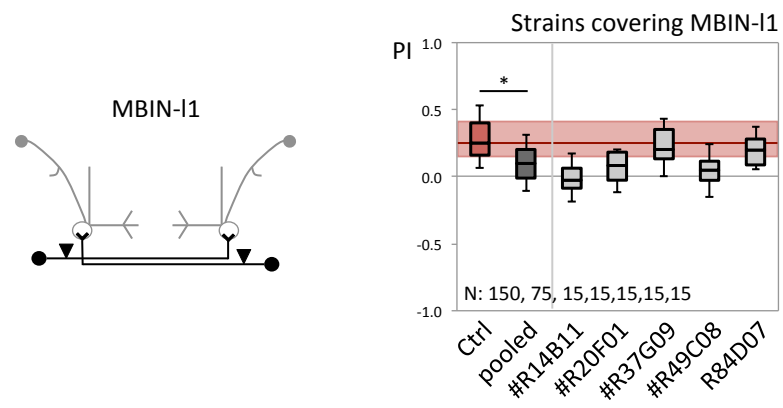

10

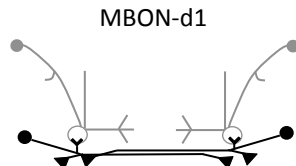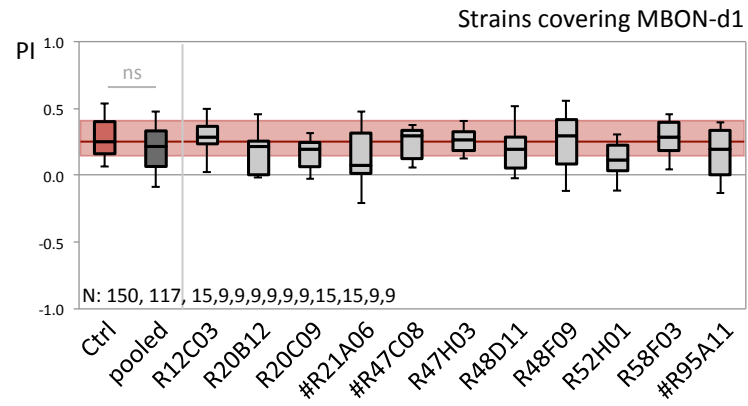

11

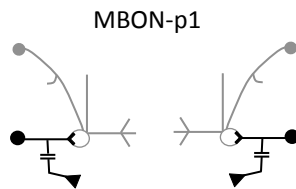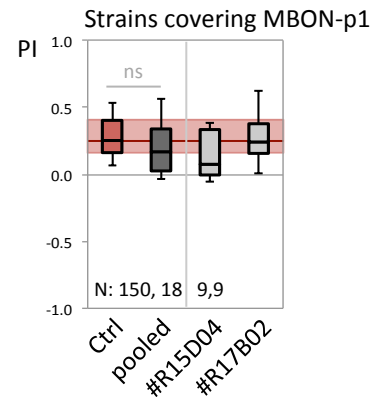

12

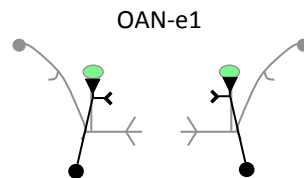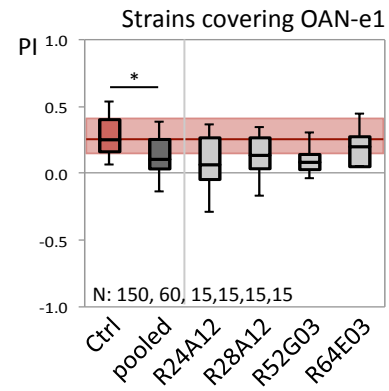

13

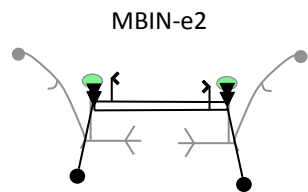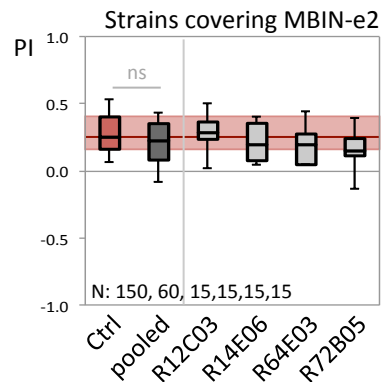

14

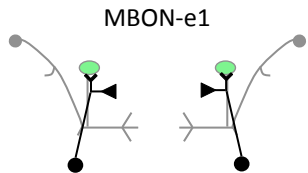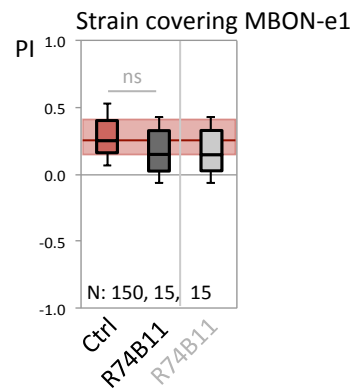

15

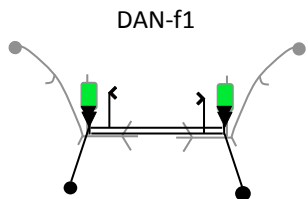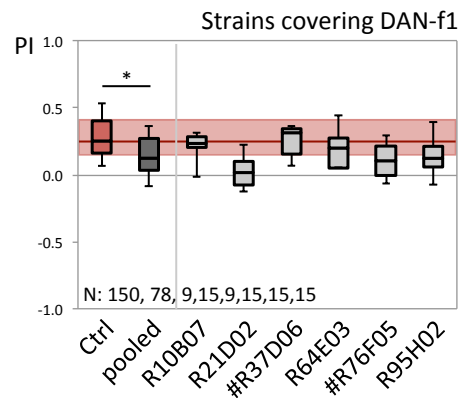



16

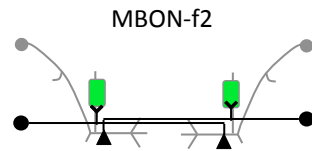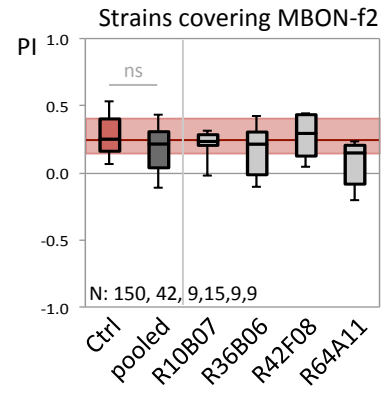

17

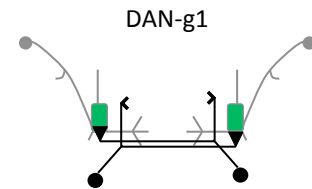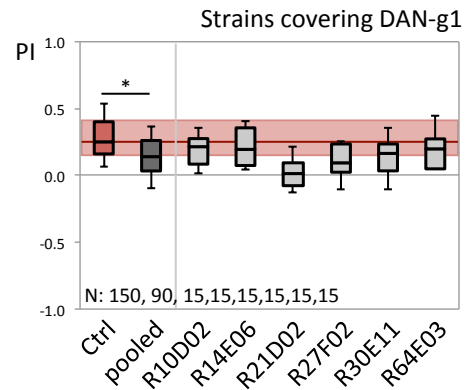

18

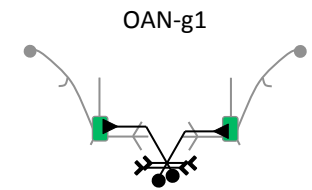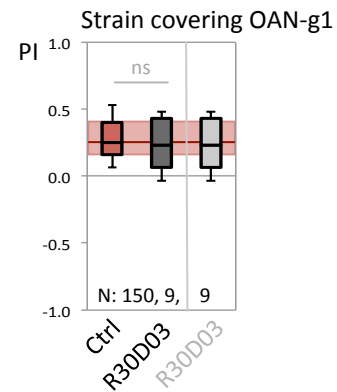

19

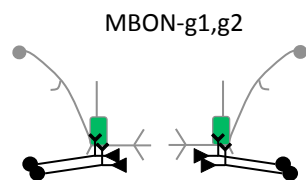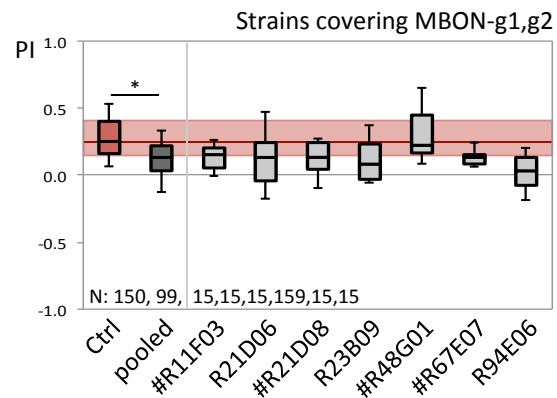

20

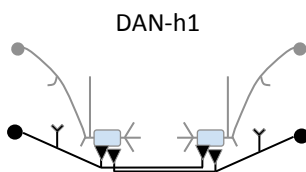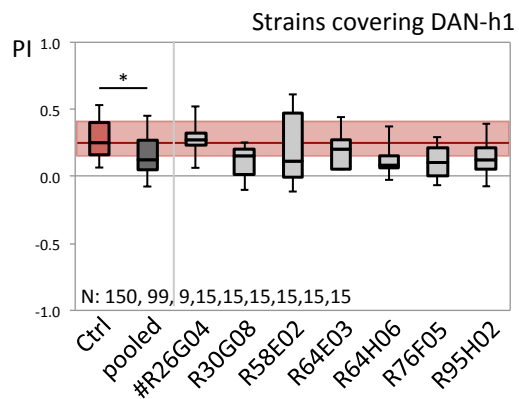

21

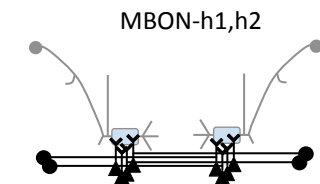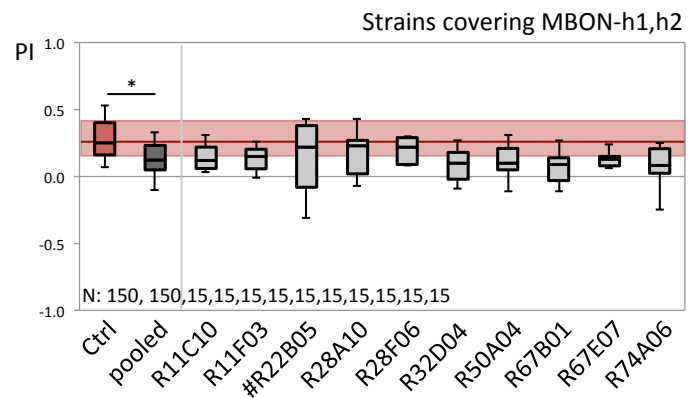

22

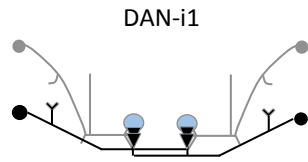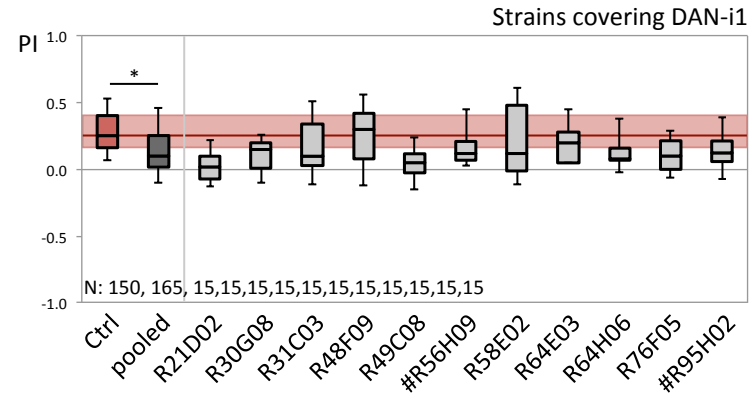

23

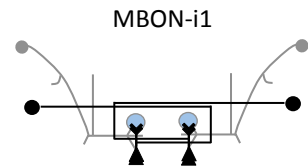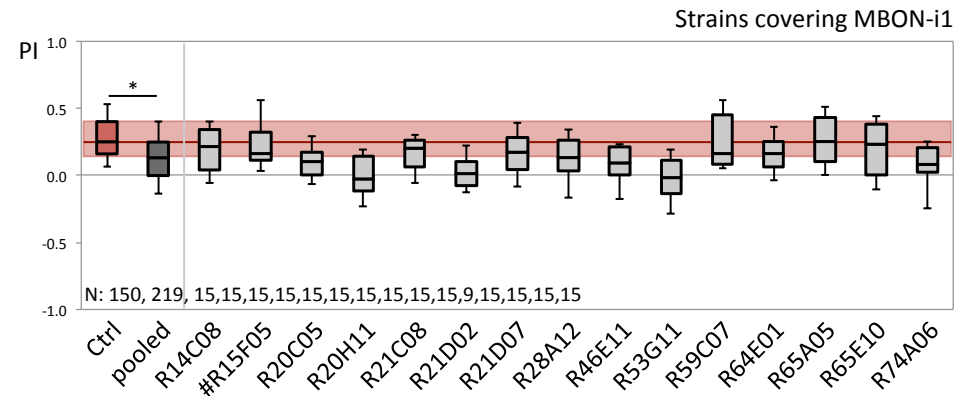

24

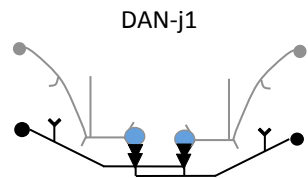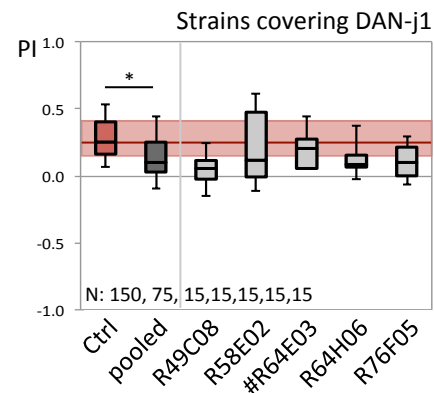

25

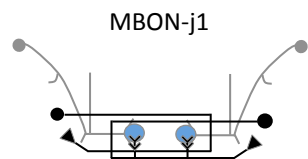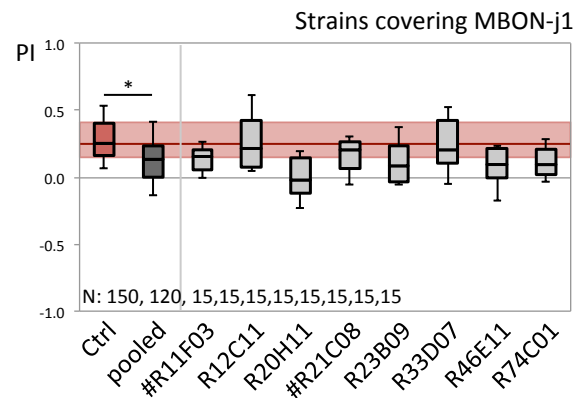

26

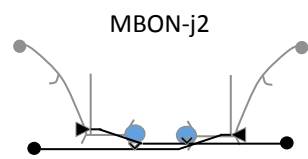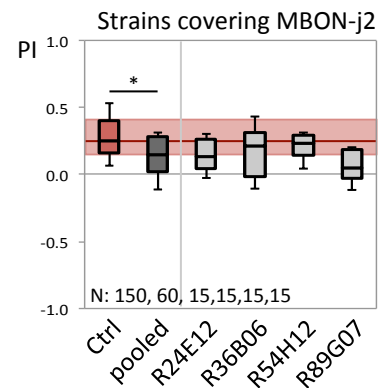

27

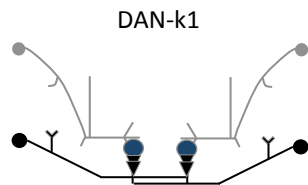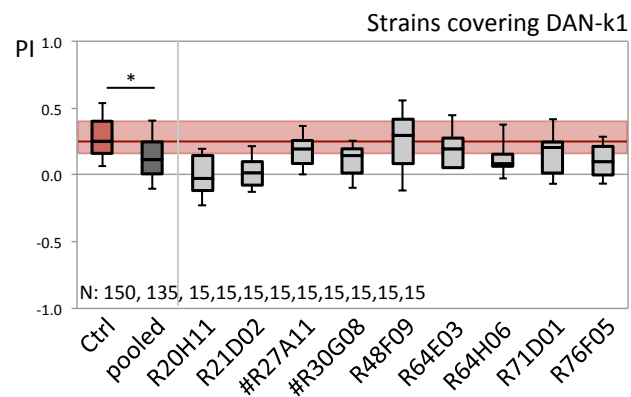

28

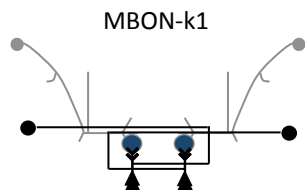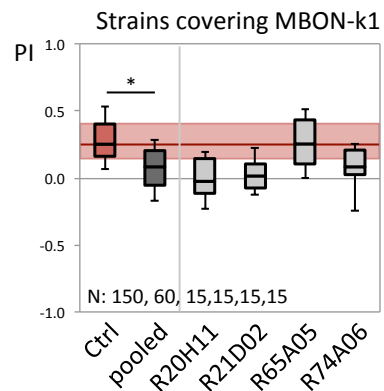

29

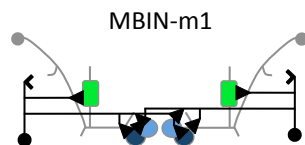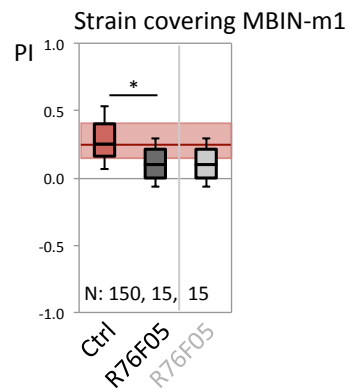

30

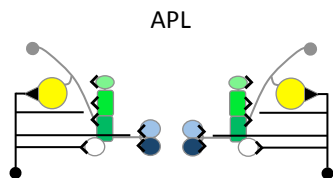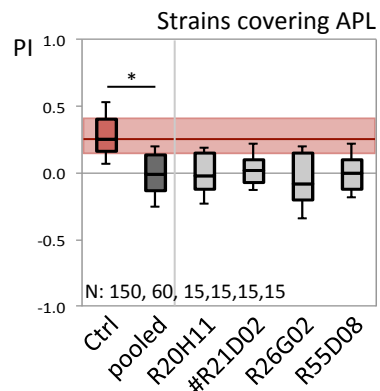

31

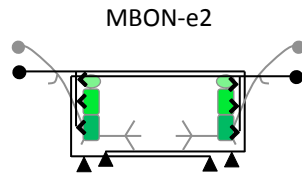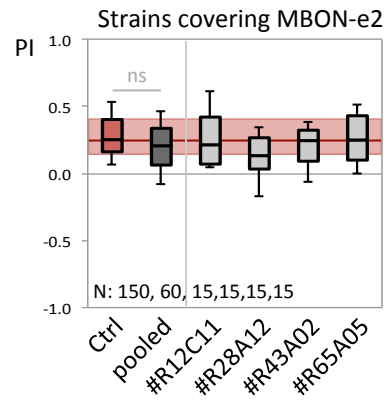

32

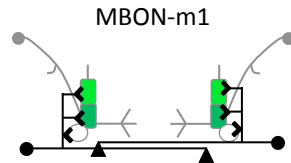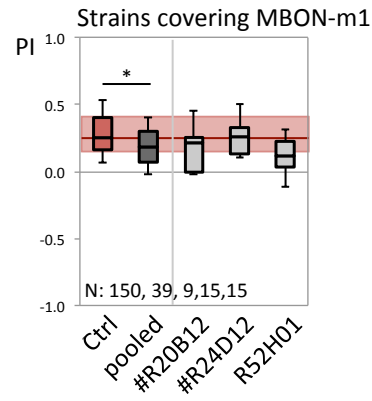

33

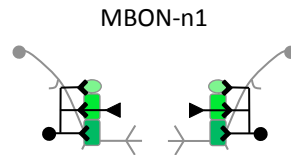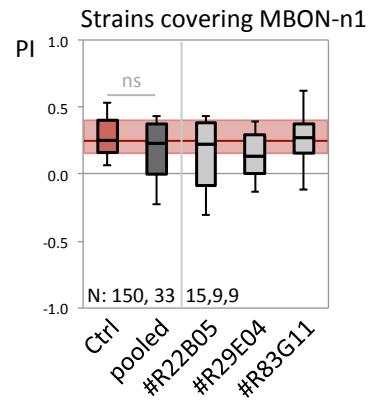

34

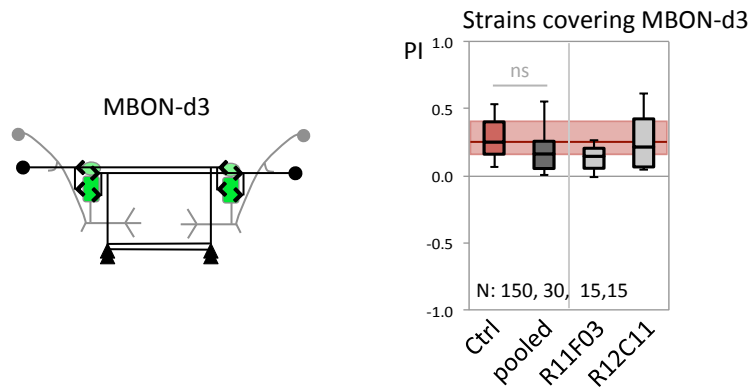

35

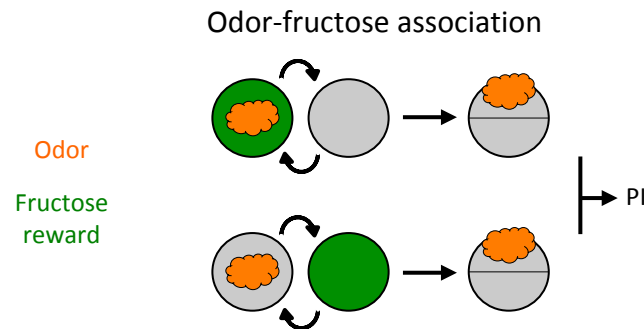

*Supplementary Figure 5: Pre-screen results, combined for Gal4 strains covering the indicated MBE neuron* (Panels 1-34) Gal4 strains including MBE neurons in their expression pattern were crossed to *UAS-shi<sup>ts</sup>*. At restrictive temperature and thus with synaptic output blocked from the respectively covered neurons, the larvae were trained in an odor-fructose reward associative learning task (panel 35). Appetitive odor-fructose memory is indicated by positive associative performance indices (PIs). Throughout panels 1-34, a schematic of the respectively indicated MBE neuron is shown in addition. The red shading indicates the 25/75% quantile of the genetic control strain heterozygous for *UAS-shi<sup>ts</sup>* but not expressing Gal4 (Ctrl). Sample sizes are indicated within the figure. \* and ns refer to  $P < 0.05$  and  $P > 0.05$ , respectively, in Mann-Whitney U-tests between the control and the data combined across the experimental strains presented individually to the right. The # symbol indicates that the strain yielded the respective cell as a flip-out clone, but that the cell cannot be discerned directly from the expression pattern of the Gal4 strain; this suggests stochastic and/or weak transgene expression in the respective cell and strain. In general, possible differences between Gal4 strains in stochasticity and level of transgene expression should be borne in mind when interpreting the pre-screen results. Also, there may be combinatorial effects when a Gal4 strain expresses in more than one MBE (Table 2, Table 3) and/or in neurons outside the mushroom body (2) (<http://flweb.janelia.org/cgi-bin/flew.cgi>). Further, many Gal4 strains used in the pre-screen led to transgene expression in more than one MBE so it was practically impossible to run all strains covering the same MBE in parallel. Last but not least, firm conclusions would require the full set of genetic and behavioral controls as employed in the follow-up experiments shown in Figure 3, Figure 4-6, Figure 8 and Figure 10. (Panel 35) Schematic of the odor-fructose reward association paradigm; details as in Figure 3e.

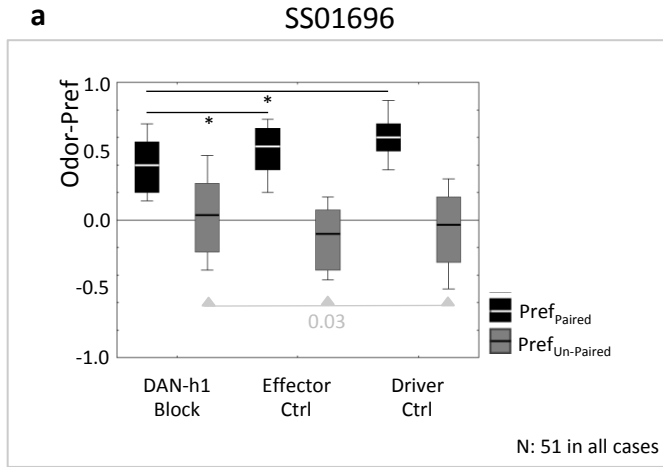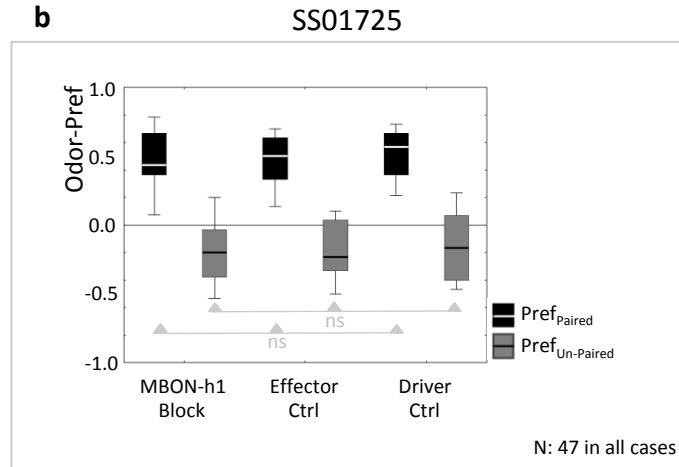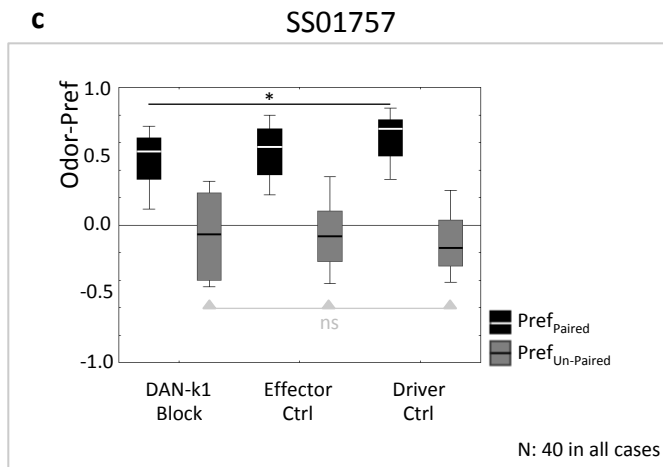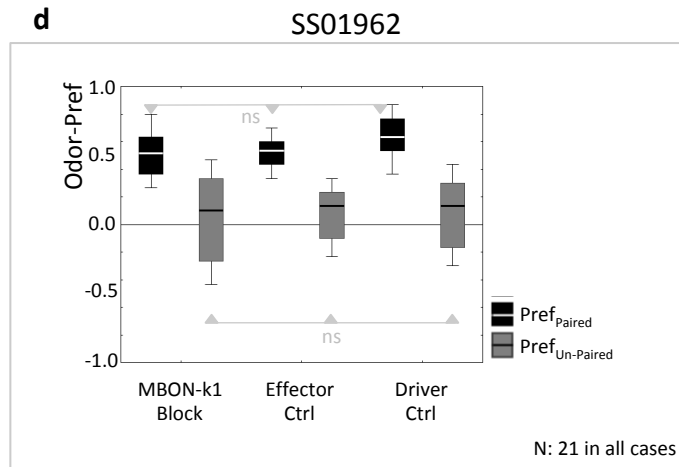

Supplementary Figure 6, *ctd.*



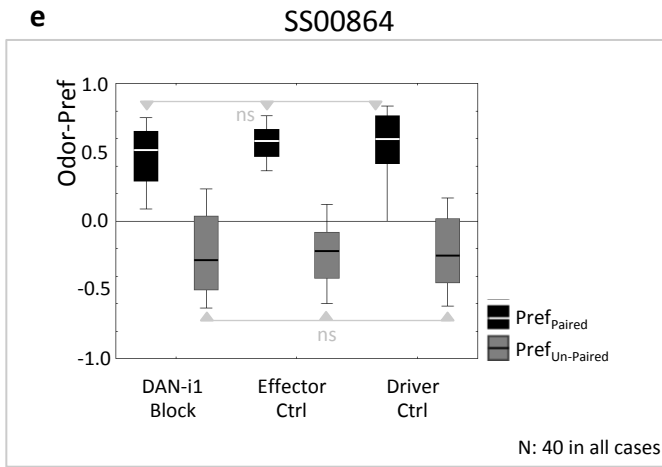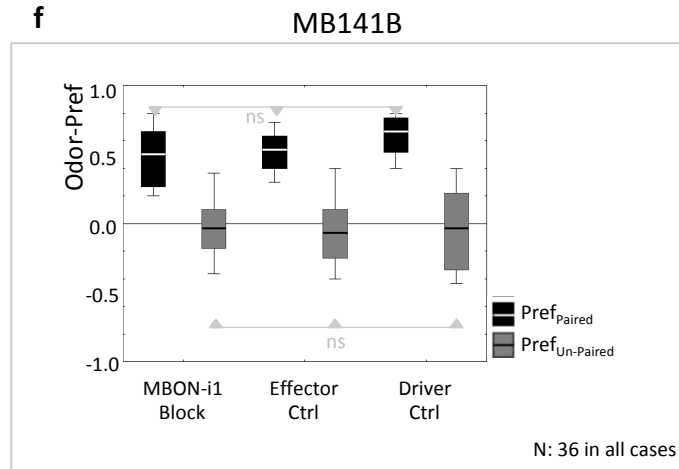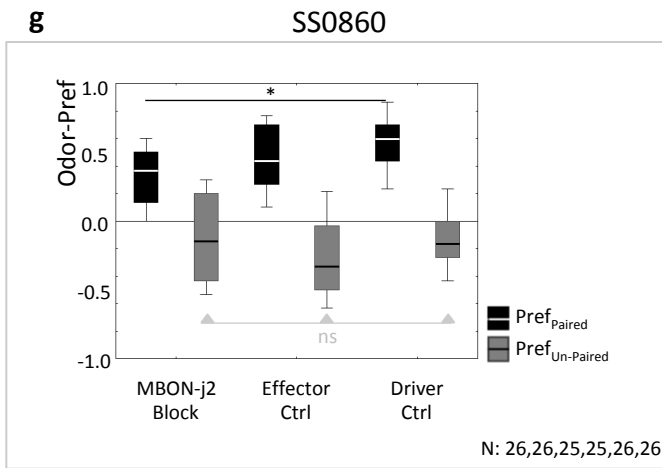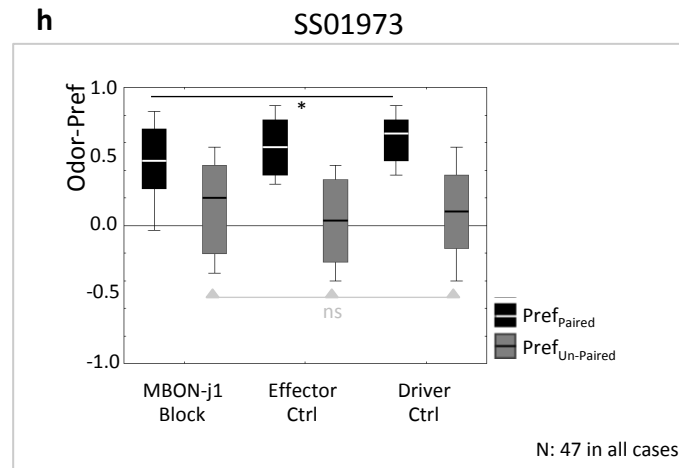

*Ctd. Supplementary Figure 6*

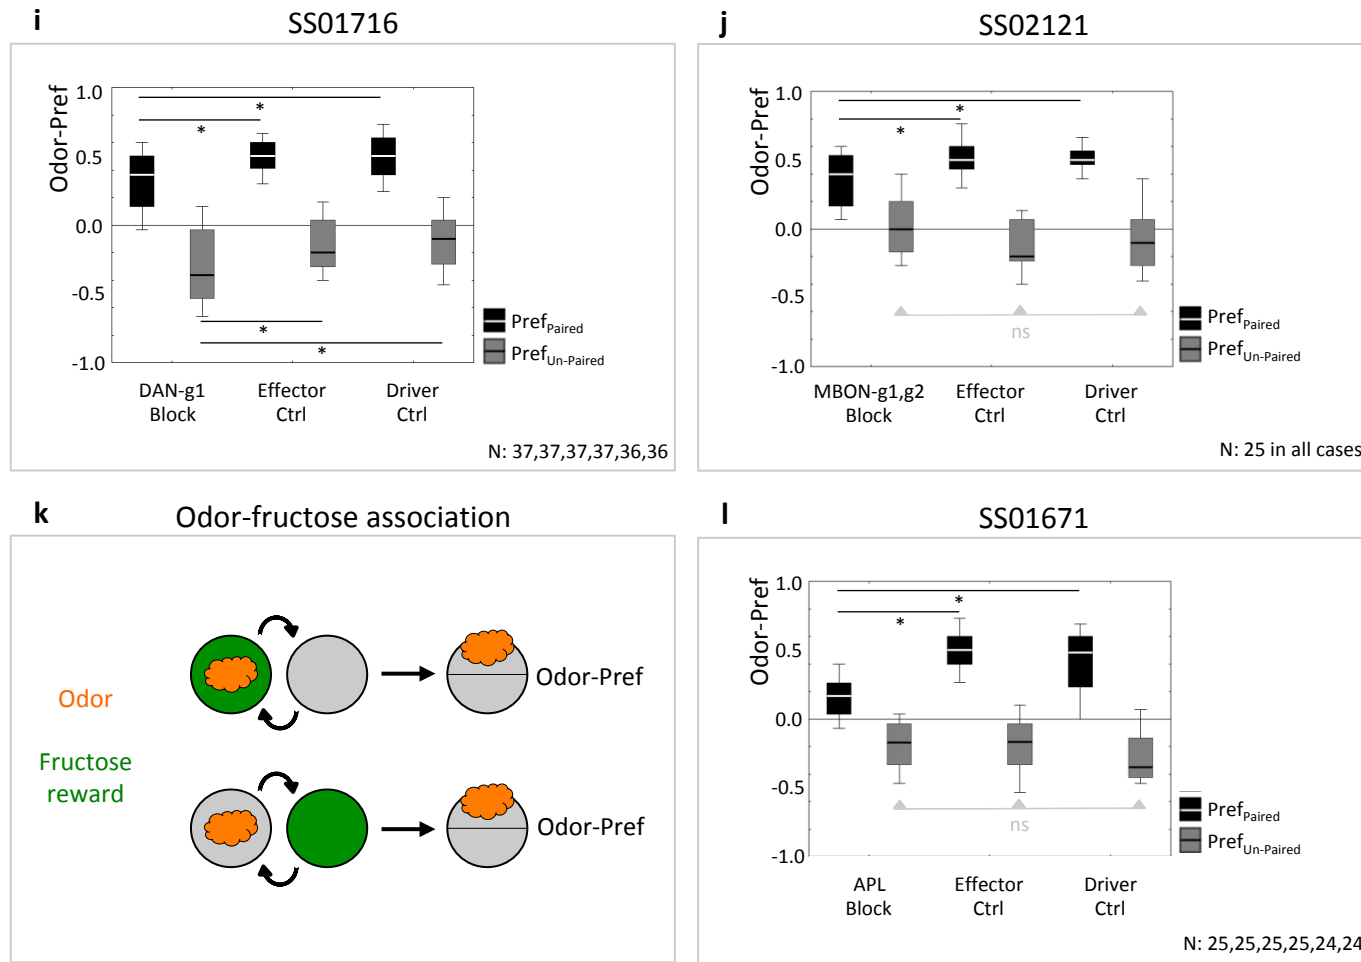

*Supplementary Figure 6: Preference scores from odor-fructose association experiments upon silencing MBEs*

(a-k) Preference scores for the trained odor *n*-amylacetate (Odor-Pref) underlying the associative performance indices (PI) displayed in Figure 3a-d and Figure 4a-f (a-j). A schematic of the training paradigm is shown in (k) (details as in Figure 3e).

(l) Same as in (a-j), regarding the associative performance indices (PI) displayed in Figure 10a.

Sample sizes are indicated within the figure. \* refers to  $P < 0.05/2$  in Mann-Whitney U-tests; ns refers to  $P > 0.05$  in Kruskal-Wallis tests.

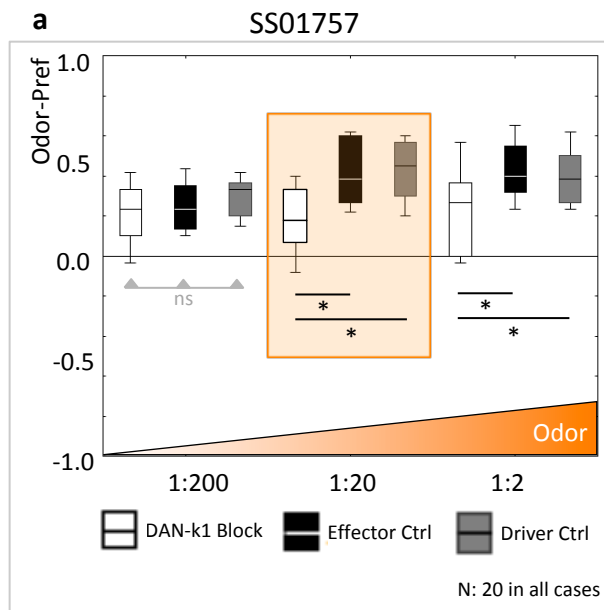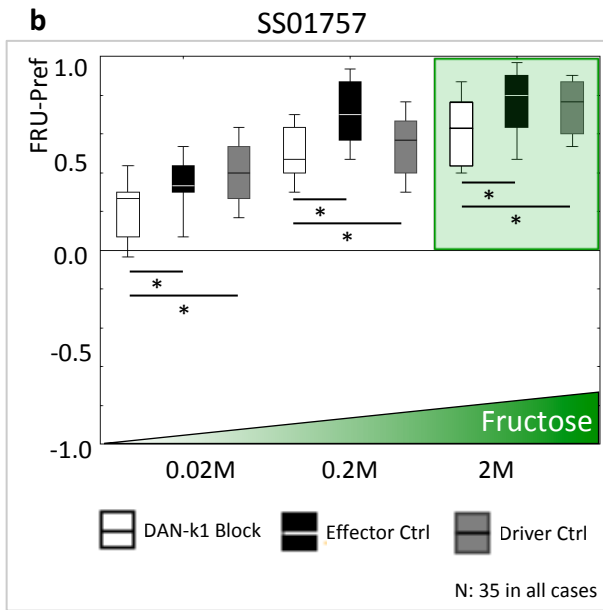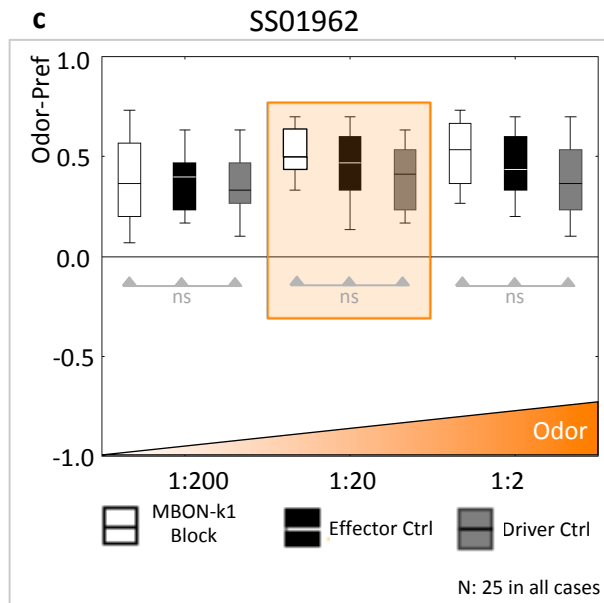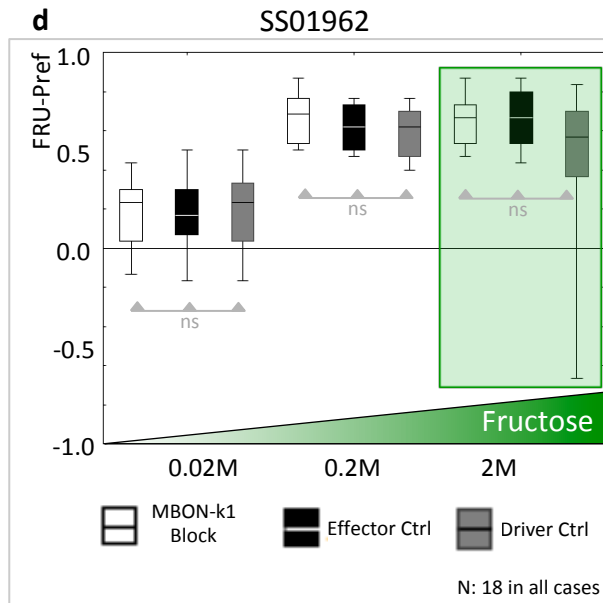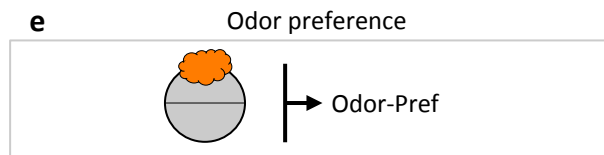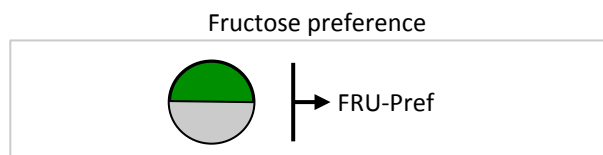

Supplementary Figure 7: Differential requirement of DAN-k1 but not MBON-k1 for innate odor- and fructose preference - extended

(a, b) For the split-Gal4 strain covering the MBIN to the lower toe of the medial lobe (DAN-k1; SS01757), the panels show the preference scores of experimentally naïve larvae for the odor *n*-amylacetate (a; AM), or for fructose (b; FRU), at the indicated dilutions/concentrations. Larvae are either heterozygous for the split-Gal4 drivers as well as *UAS-Kir2.1::GFP* (DAN-k1 Block), or heterozygous for only the *UAS-Kir2.1::GFP* effector (Effector Ctrl), or heterozygous for only the split-Gal4 drivers (Driver Ctrl).

(c, d) Same as for (a, b), concerning the MBON of the same compartment (MBON-k1; SS01962).

(e) Schematics of the preference paradigms (details as in Figure 3e).

Please note that the data for *n*-amylacetate preference and fructose preference emphasized by the bounding boxes are also presented in Figure 3c for DAN-k1.

Sample sizes are indicated within the figure. \* refers to  $P < 0.05/2$  in Mann-Whitney U-tests; ns refers to  $P > 0.05$  in Kruskal-Wallis tests.

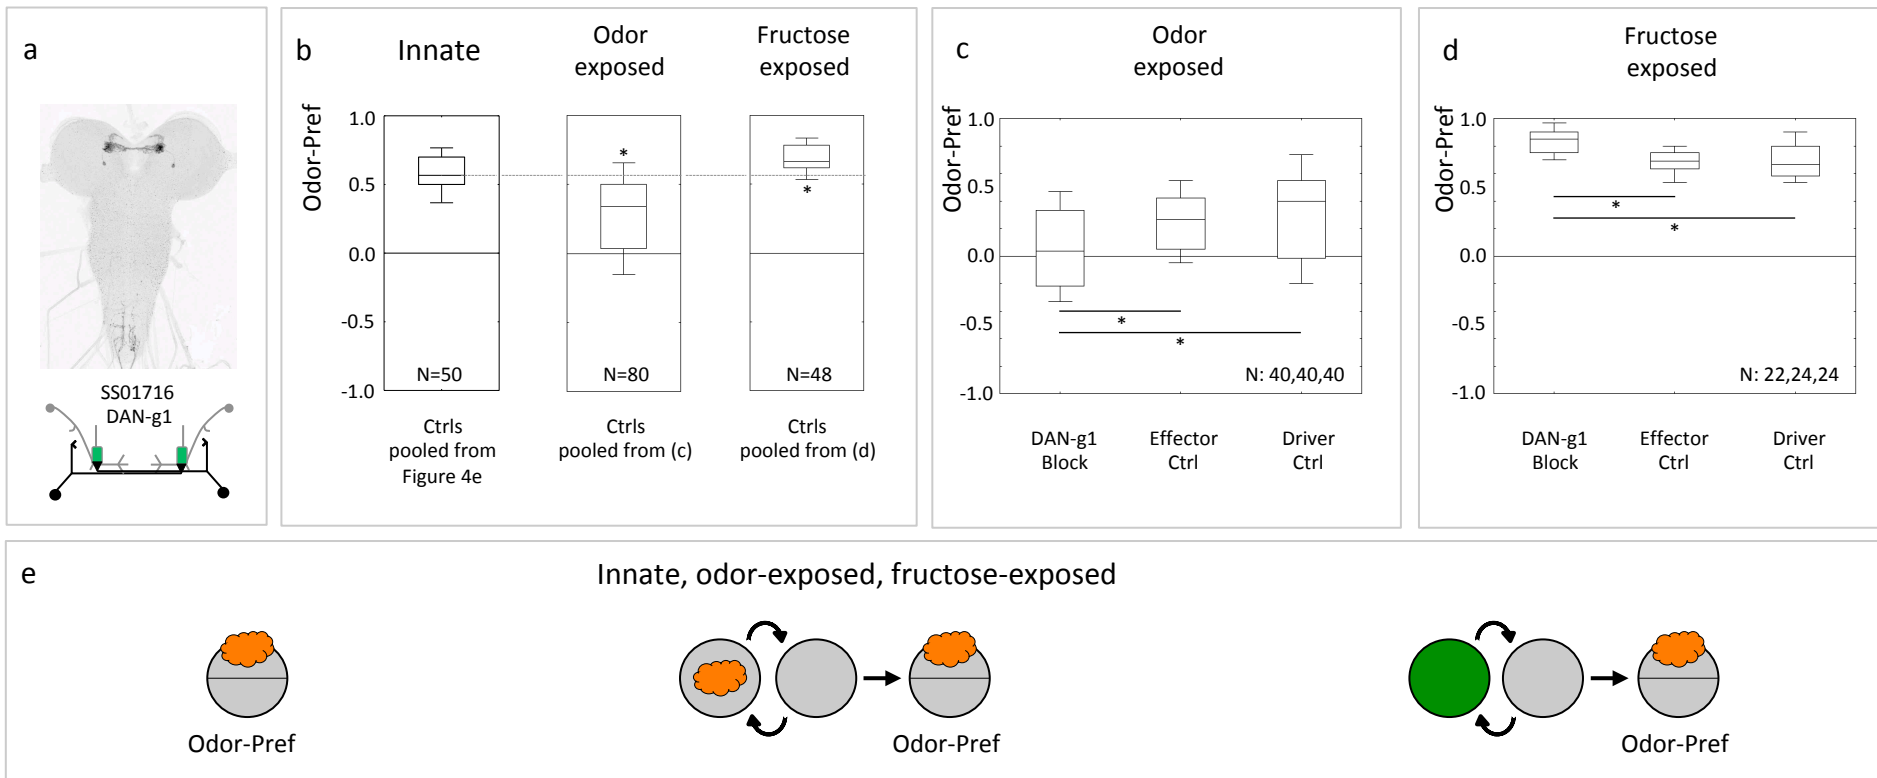

*Supplementary Figure 8: Silencing DAN-g1 makes larvae more susceptible to the non-associative effects of stimulus-exposure*

(a) Expression pattern of the split-Gal4 strain covering the MBON of the lower vertical lobe (DAN-g1; SS01716). Regarding this neuron, a closer inspection of the odor-fructose association data upon its silencing suggests an unexpected function. Although innate odor preference remains intact (Figure 4e), odor preference scores are shifted towards the negative both after paired odor-fructose reward training and after unpaired presentations of odor and fructose (Figure S6i). In analyses of associative learning, such effects are intentionally averaged-out by calculating the difference in preference between paired versus unpaired-trained groups for the associative performance index (Figure 3e). Importantly, no such general, non-associative shift in preference towards the negative is seen for any other neuron in this study (Figure S6); in particular, it is not seen for the output neuron double pair of the compartment innervated by DAN-g1 (MBON-g1,g2; Figure S6j). It was thus asked whether silencing DAN-g1 specifically affects odor preference after non-associative stimulus exposure.

(b-d) In genetic controls odor exposure decreases odor preference (b; 3-4), an effect that is boosted upon silencing DAN-g1 (c). Fructose exposure increases odor preference in genetic controls (b; 3-4), an effect that is likewise boosted by silencing DAN-g1 (d). Thus, silencing DAN-g1 makes the larvae more susceptible to the effects of odor-only exposure and to the effects of fructose-only exposure; undisturbed activity in DAN-g1 thus appears to be required to partially “buffer” olfactory behavior against non-associative effects of stimulus-exposure. Sample sizes are indicated within the figure. In (b) \* refers to  $P < 0.05/2$  in Mann-Whitney U-tests versus innate odor preference. In (c, d) \* refers to  $P < 0.05/2$  in Mann-Whitney U-tests.

(e) Schematic of the paradigms to measure innate odor preference in experimentally naïve larvae, odor preference after odor exposure, and odor preference after fructose exposure (details as in Figure 3e).

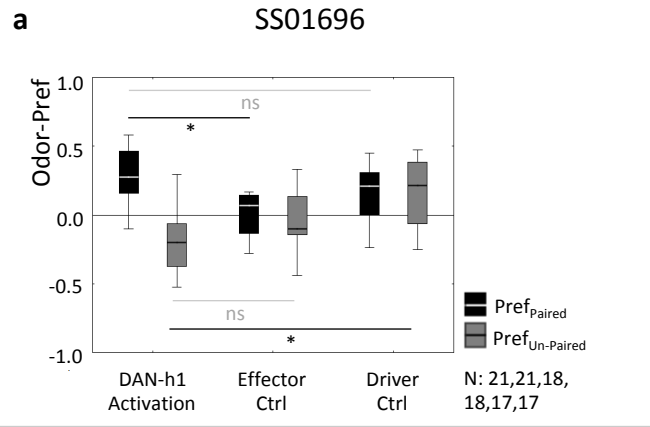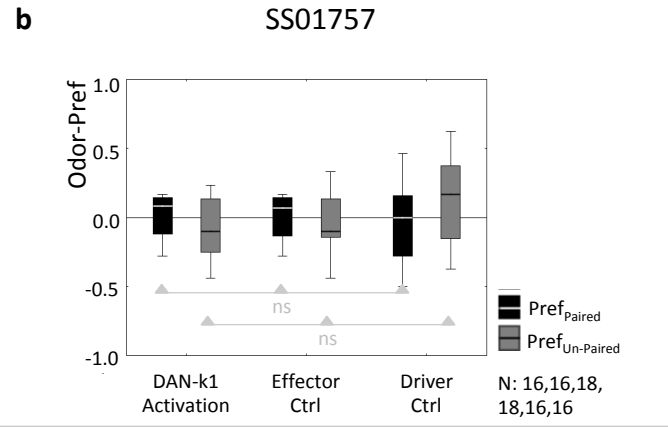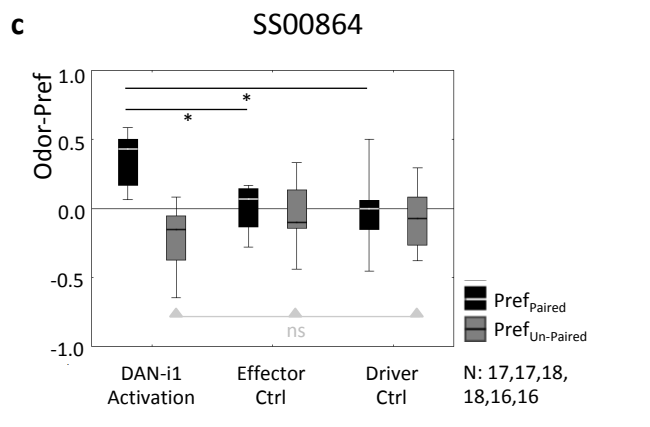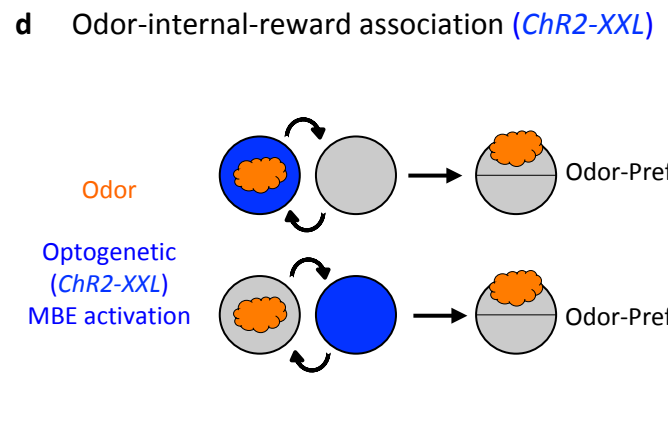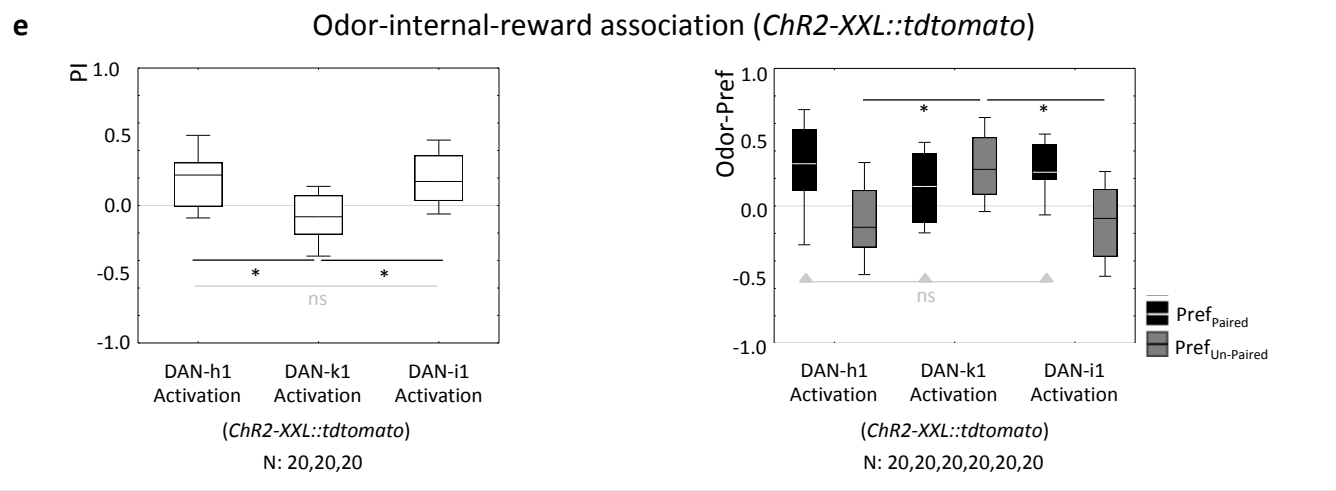

Supplementary Figure 9: Preference scores from odor-internal-reward association experiments using *Chr2-XXL*, and use of *Chr2-XXL::tdtomato* for odor-internal-reward association experiments

(a-c) Preference scores for the trained odor *n*-amylacetate (Odor-Pref) underlying the associative performance indices (PI) displayed in Figure 5a-c using *Chr2-XXL* for optogenetic activation of the indicated DAN as an internal reward.

(d) Schematic of the training paradigm (details as in Figure 5d).

(e) Performance indices and Preference scores for odor-internal-reward association using *Chr2-XXL::tdtomato* as the effector. As with *Chr2-XXL*, DAN-h1 and DAN-i1, but not DAN-k1, are sufficient as an internal reward signal.

Sample sizes are indicated within the figure. At plain horizontal lines \* refers to  $P < 0.05/2$  and ns to  $P > 0.05/2$  in Mann-Whitney U-tests; at horizontal lines with arrowheads, ns refers to  $P > 0.05$  in Kruskal-Wallis tests.

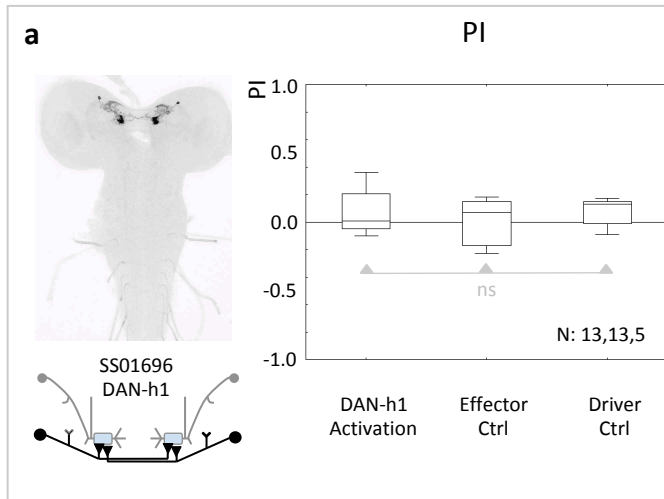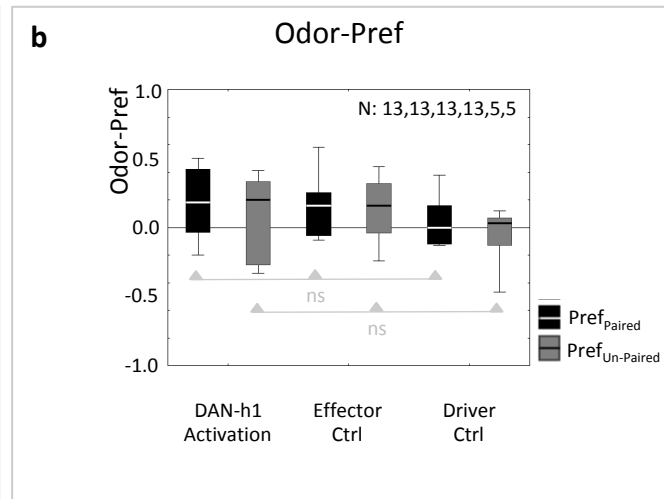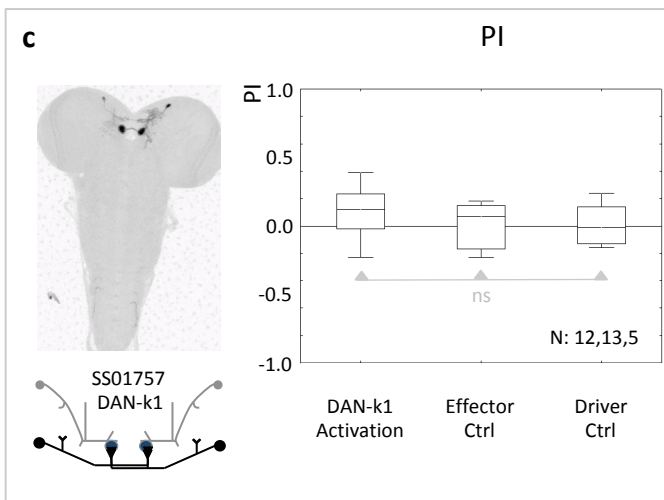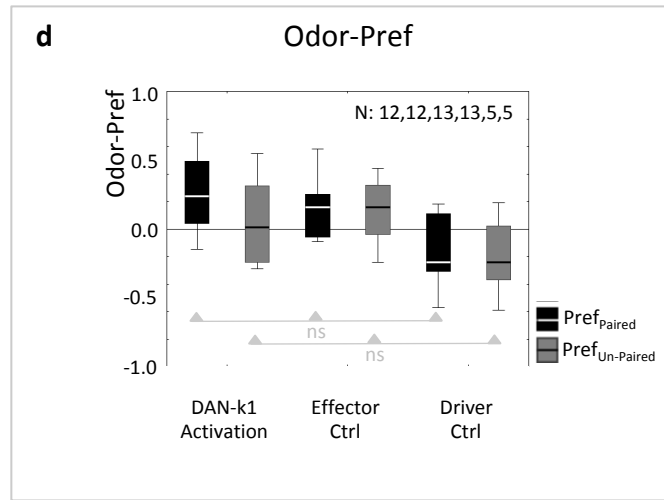

*Saumweber et al. Fig S10, ctd*

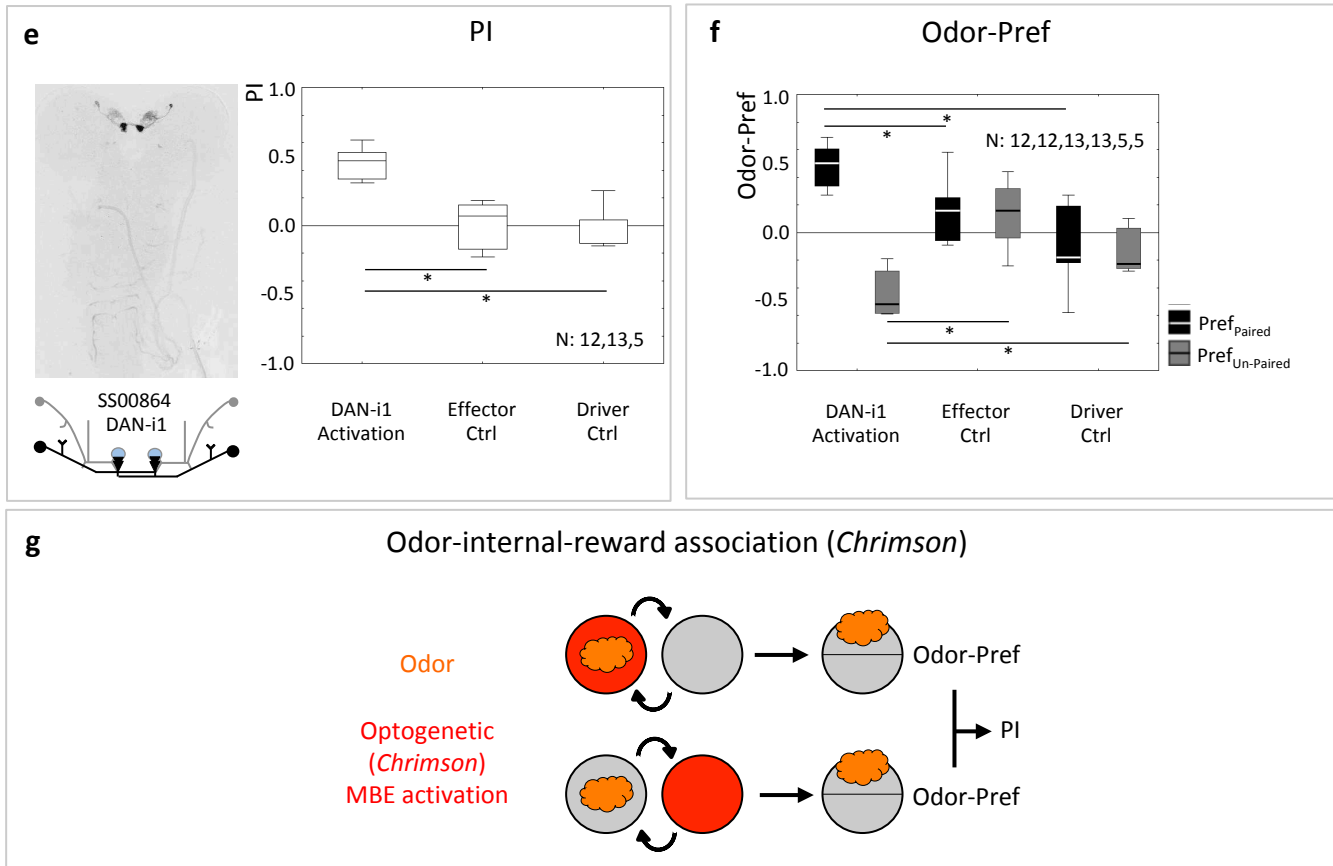

*Supplementary Figure 10: Odor-internal-reward association experiments using *Chrimson**

(a-f) Larvae are trained with odor stimulation and optogenetic activation of the indicated DANs as an internal reward signal. The panels show the expression pattern of the indicated split-Gal4 strain and a schematic overview of the covered DAN, as well as the associative performance indices after internal-reward training (a, c, e), and the underlying preference scores (b, d, f). Larvae are either heterozygous for the split-Gal4 drivers as well as *UAS-Chrimson* (DAN-Activation), or heterozygous for only the *UAS-Chrimson* effector (Effector Ctrl), or heterozygous for only the split-Gal4 drivers (Driver Ctrl). Activation of DAN-h1 (a, b) as well as activation of DAN-k1 (c, d) is without measurable effect, whereas activation of DAN-i1 (e, f) is sufficient as an internal reward.

(g) Schematic of the associative learning paradigm with odor and internal-reward (details as in Figure 5d, except that red light is used for the activation of neurons by *Chrimson*).

Sample sizes are indicated within the figure. \* refers to  $P < 0.05/2$  in Mann-Whitney U-tests; ns refers to  $P > 0.05$  in Kruskal-Wallis tests.

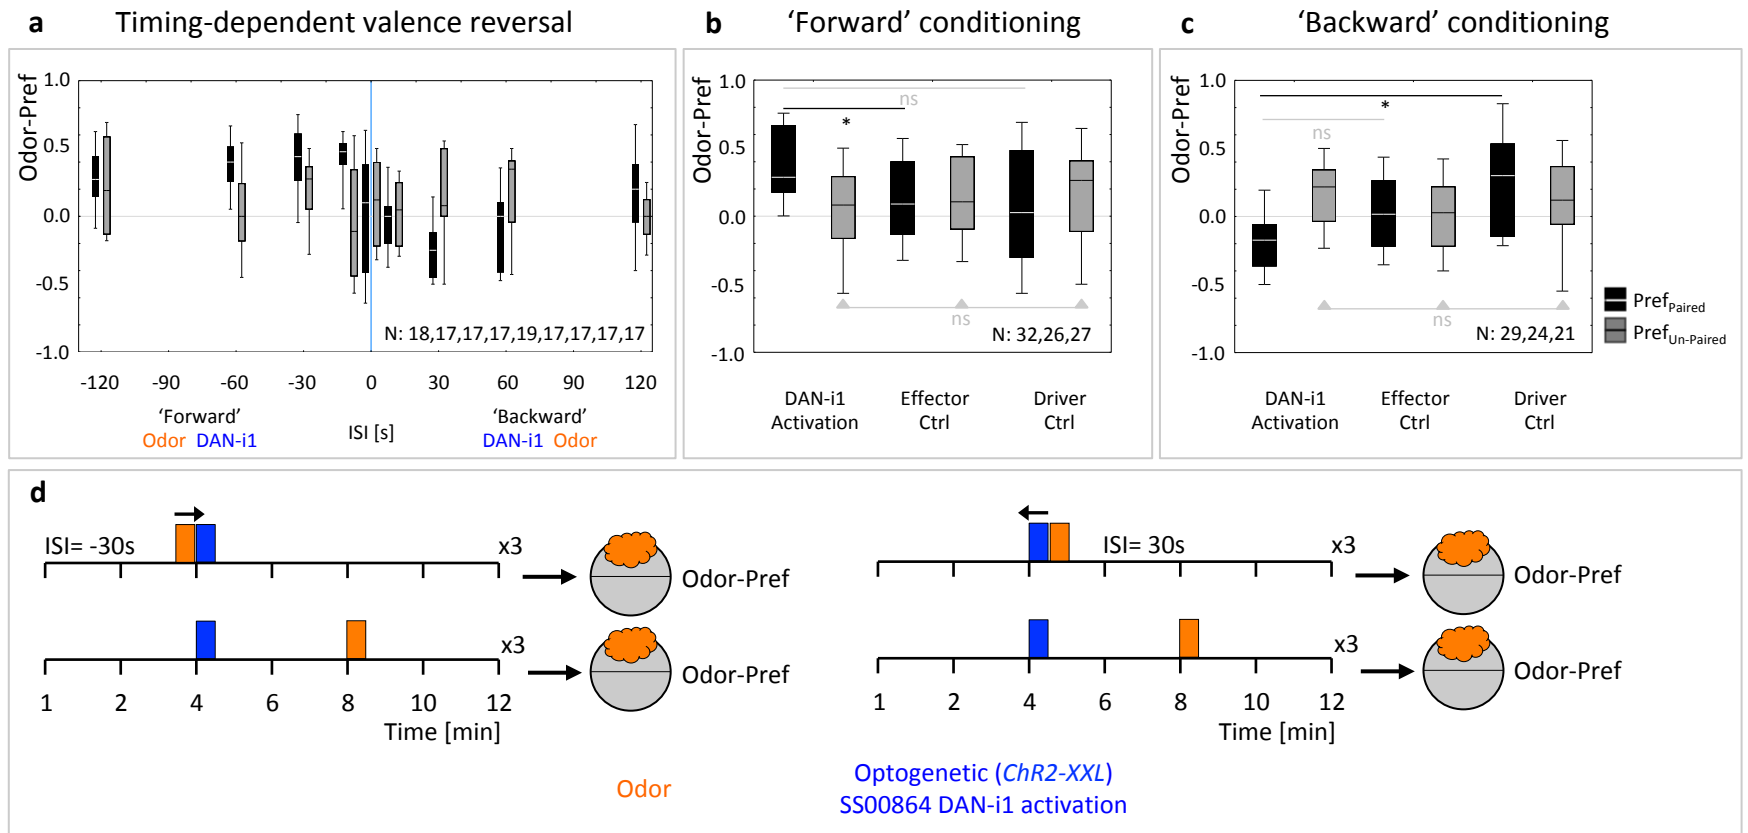

Supplementary Figure 11: Preference scores from timing-dependent valence reversal of optogenetic DAN-i1 reinforcement

(a-c) Preference scores for the trained odor *n*-amylacetate (Odor-Pref) underlying the associative performance indices (PI) displayed in Figure 6a-c using *ChR2-XXL* for optogenetic activation of DAN-i1 as an internal reward at various relative timings between odor presentation and DAN-i1 activation (Inter-Stimulus-Interval, ISI)

(d) Schematic of the training paradigm (details as in Figure 6d).

Sample sizes are indicated within the figure. At plain horizontal lines \* refers to  $P < 0.05/2$  and ns to  $P > 0.05/2$  in Mann-Whitney U-tests; at horizontal lines with arrowheads, ns refers to  $P > 0.05$  in Kruskal-Wallis tests.



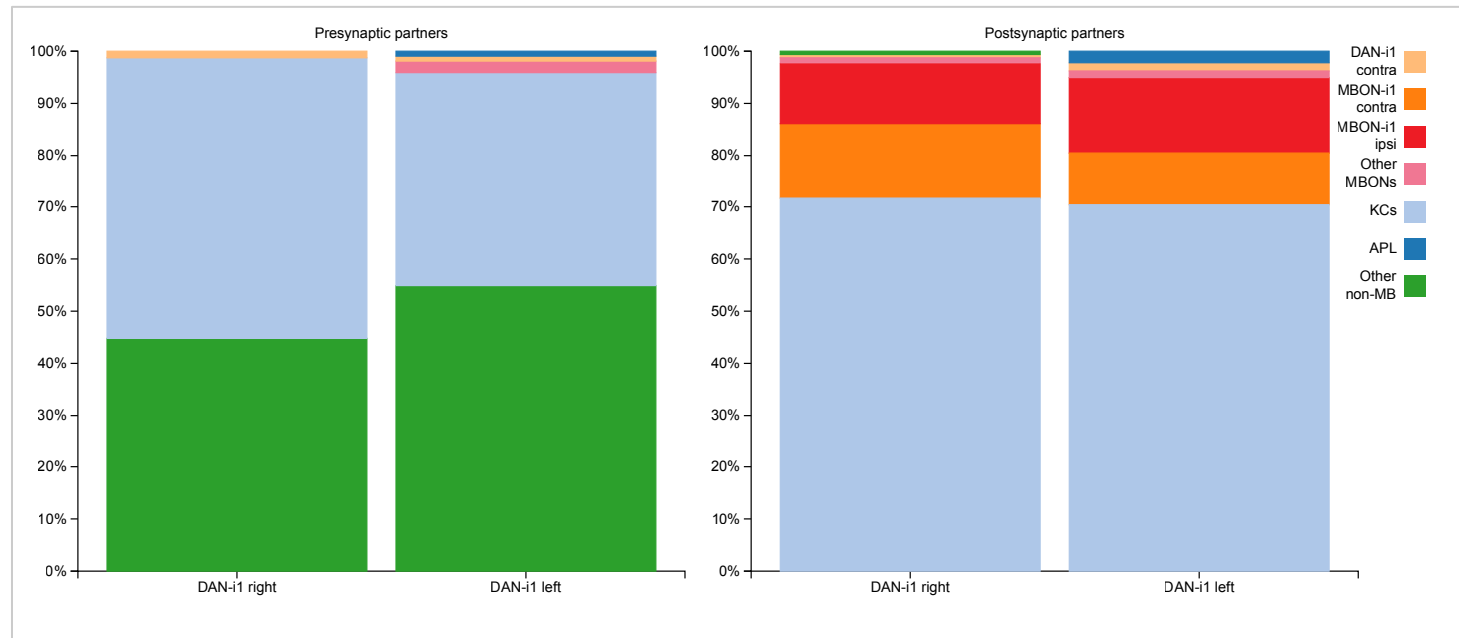

*Supplementary Figure 12: Synaptic partners of DAN-i1*

Number of presynaptic partners of DAN-i1 as a percentage of the total number of synaptic inputs to DAN-i1 (left panel), and number of postsynaptic partners of DAN-i1 as a percentage of the total number of synaptic outputs from DAN-i1 (right panel), in both cases separated for the right- and left-hemisphere DAN-i1. Thus, DAN-i1 collects input from outside the MB, and connects reciprocally to KCs; it also delivers about a third of its outputs to the homo-compartmental MBON-i1, about equally towards MBON-i1 of the right and left hemisphere. This corresponds to the 'canonical circuit' described in (1).

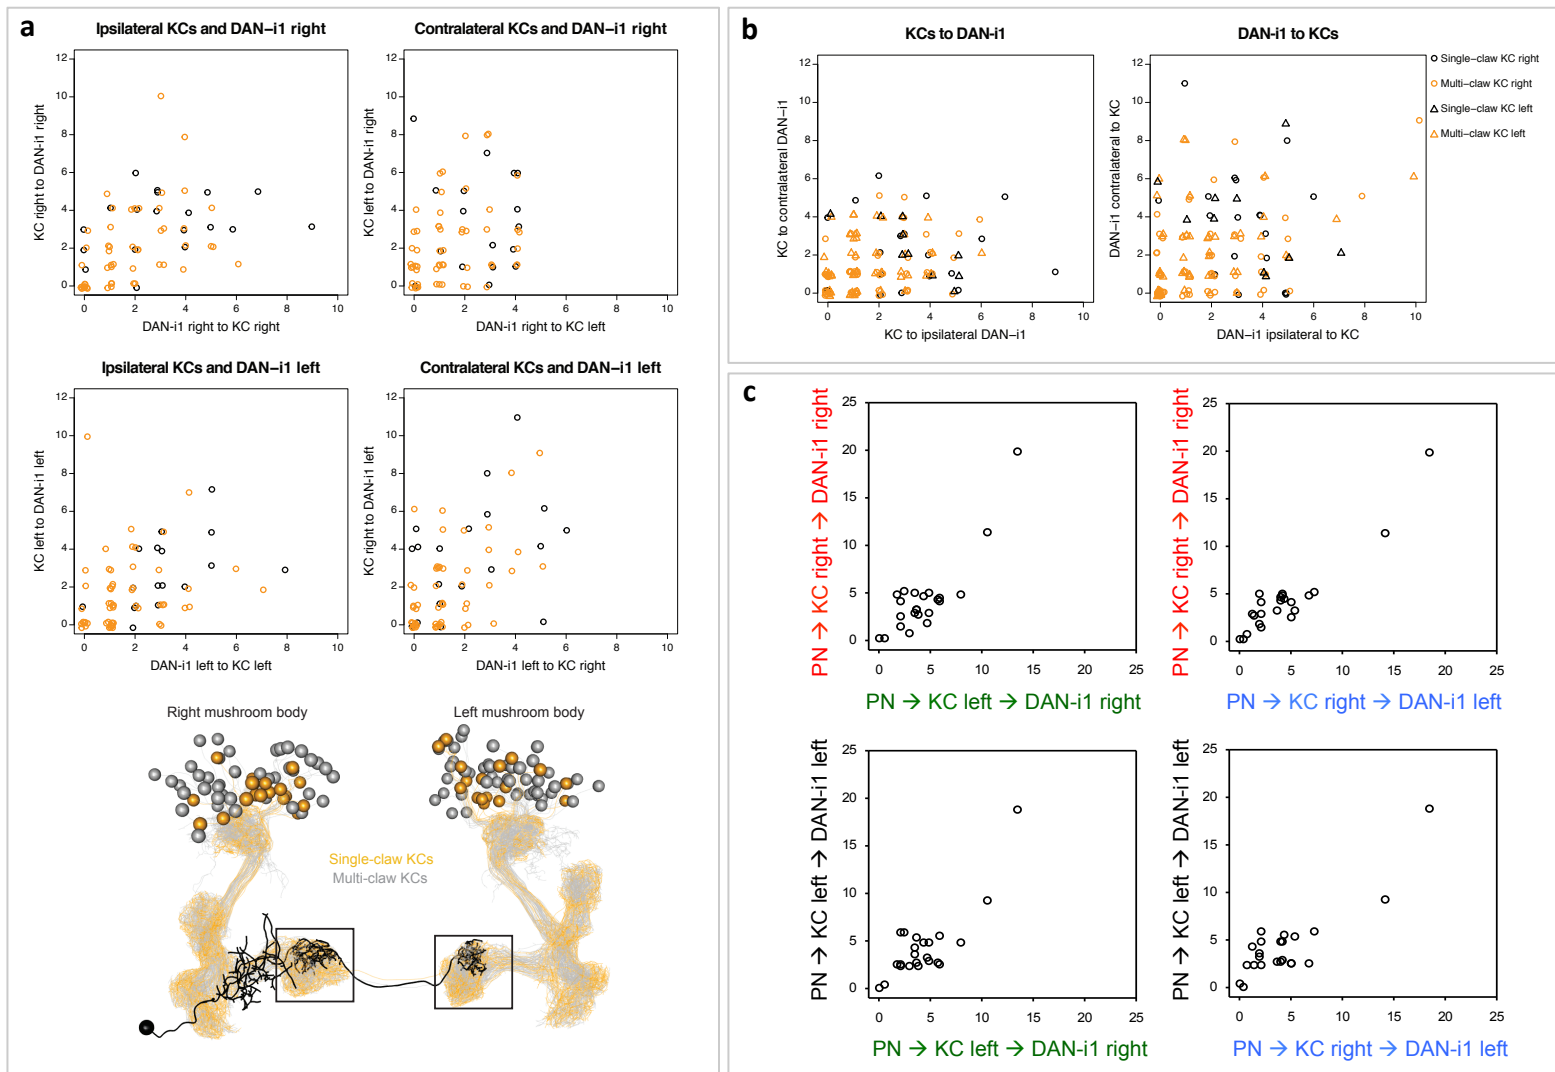

Supplementary Figure 13: Connectivity of DAN-i1 with KCs

(a) Data from Figure 7d, separated by body side. That is, for those KCs reciprocally connected with DAN-i1, the number of KC-to-DAN-i1 synapses versus the number of DAN-i1-to-KC synapses is plotted. The two top panels present these data for the right-hemisphere DAN-i1, separated for the KCs ipsi- and contralateral to it (left and right panel, respectively). The two middle panels show the same for the left-hemisphere DAN-i1. Single- and multi-claw KCs are presented separately. Apparent correlations (Spearman rank correlation analyses at  $P < 0.05$ ) contrast with the case of the APL neuron where no such correlations are found (Figure 9c). For an overview, the bottom panel reproduces Figure 7a. (b) KC connections to the ipsi- and contralateral DAN-i1. For each KC the number of synapses to the ipsilateral DAN-i1 versus the number of its synapses to the contralateral DAN-i1 is plotted (left panel), as are the numbers of the corresponding DAN-i1-to-KC synapses (right panel). In both panels single- and multi-claw KCs are plotted separately. This reveals a mild yet significant correlation between the number of synapses by which KCs connect to the ipsi- and contralateral DAN-i1. The correlations were determined with Spearman rank correlation analyses at  $P < 0.05$ . (c) The correlations of the PN-KC-DAN-i1 matrix product reveal that both DAN-i1s sample the KC coding space in the same way, and that likewise each DAN-i1 samples the ipsi- and contralateral KC coding space in the same way, and in proportion to the fraction of PN-KC synapses that the respective PN class contributes (which is correlated between right and left hemisphere; not shown). The same correlations are found in the case of the APL neuron (Figure 9d; Supplementary Fig. 17a). The correlations were determined with Spearman rank correlation analyses at  $P < 0.05$ .

**a** SS01696 Odor-fructose association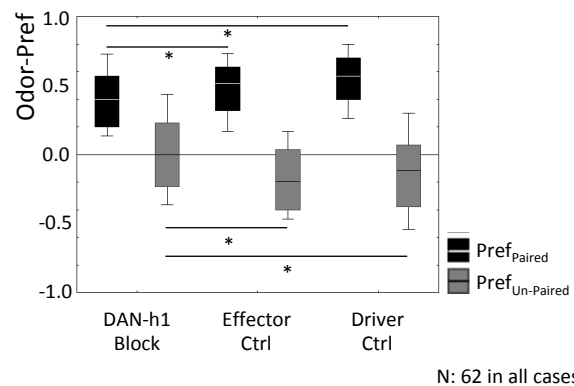**b** SS01696 Odor-<sup>low</sup>salt association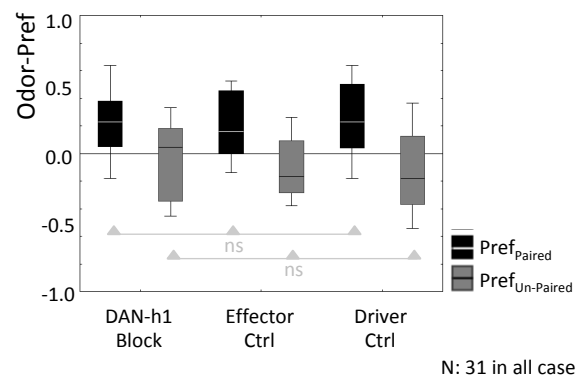**c** SS01696 Odor-amino acid association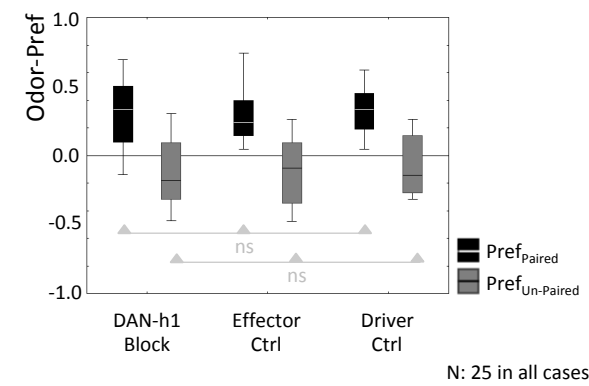**d** SS00864 Odor-fructose association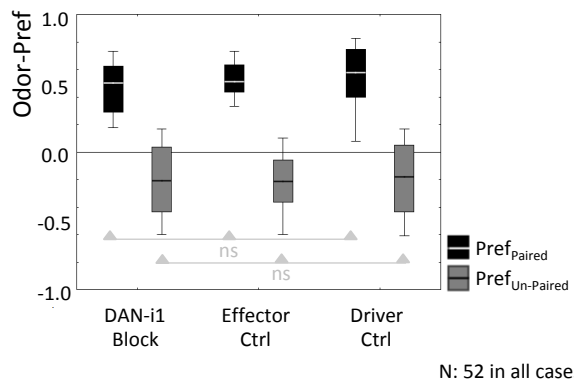**e** SS00864 Odor-<sup>low</sup>salt association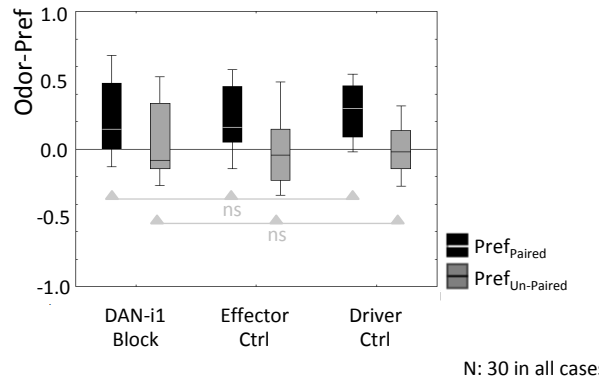**f** SS0864 Odor-amino acid association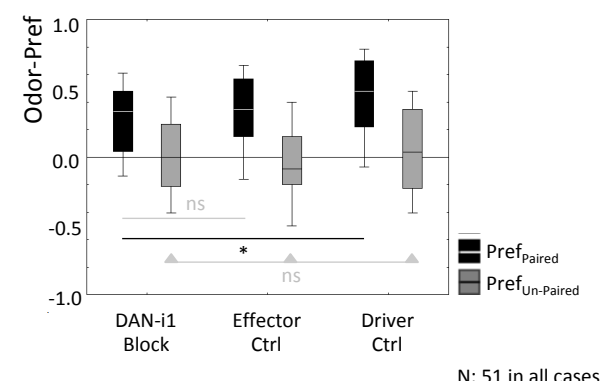**g**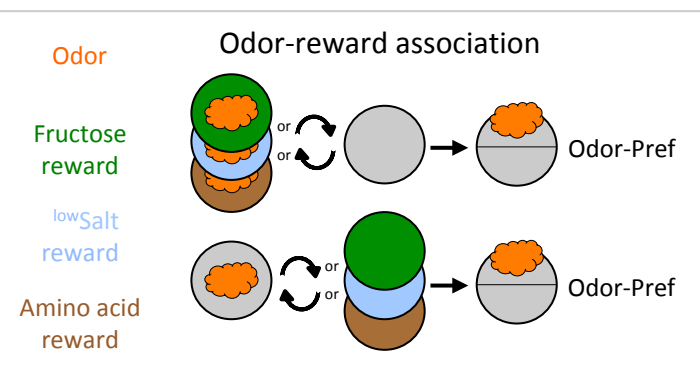

Supplementary Figure 14: Preference scores upon silencing DAN-h1 or DAN-i1, compared between taste rewards (a-c) Preference scores for the trained odor *n*-amylacetate (Odor-Pref) underlying the associative performance indices (PI) displayed in Figure 8a, regarding the silencing of DAN-h1.

(d-f) Preference scores for the trained odor *n*-amylacetate (Odor-Pref) underlying the associative performance indices (PI) displayed in Figure 8b, regarding the silencing of DAN-i1.

(g) Schematic of the training paradigm (details as in Figure 8c).

Sample sizes are indicated within the figure. \* refers to  $P < 0.05/2$  in Mann-Whitney U-tests; ns refers to  $P > 0.05$  in Kruskal-Wallis tests (except the top case in f where it refers to  $P > 0.05/2$  in a Mann-Whitney U-test).

**a** Odor-arabinose association: PI

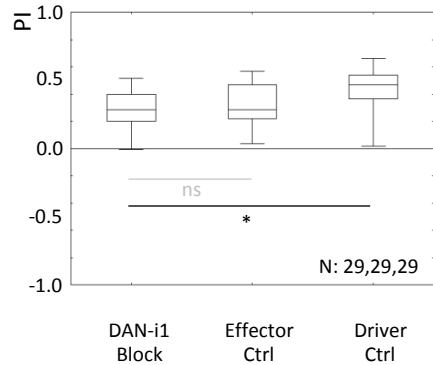

**b** Odor-Pref

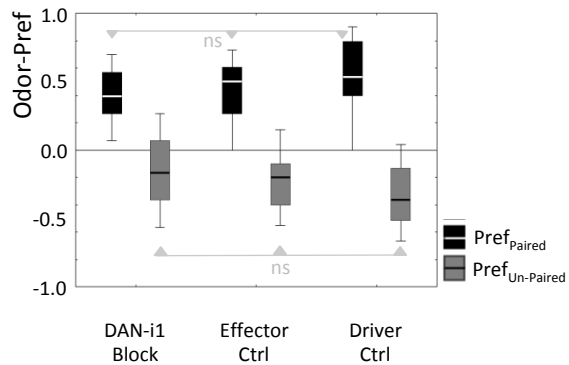

**c** Odor-sorbitol association: PI

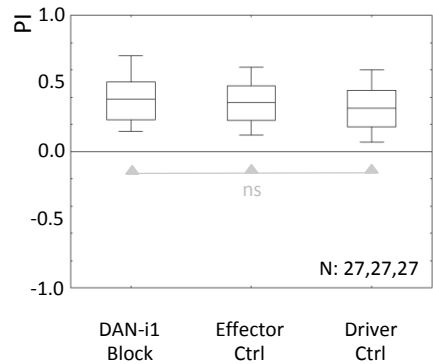

**d** Odor-Pref

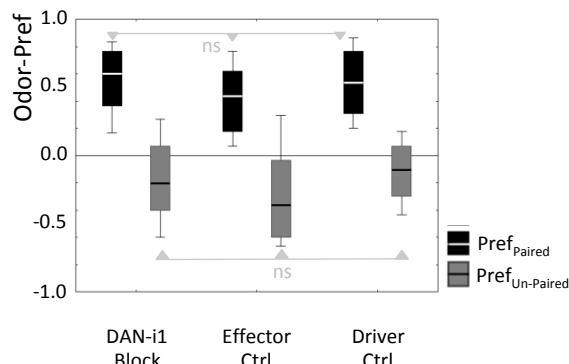

Supplementary Figure 15: Silencing *DAN-i1* impairs neither odor-arabinose nor odor-sorbitol association

(a, b) For a split-Gal4 strain covering the MBIN of the upper toe (*DAN-i1*; *SS00864*), the panels show the associative performance indices measuring odor-arabinose reward memory (a), and the preference indices underlying these associative performance indices (b) upon silencing *DAN-i1* by means of *Kir2.1::GFP* expression.

(c, d) Same as in (a, b), for odor-sorbitol reward association.

(e) Expression pattern of the split-Gal4 strain and a schematic overview of *DAN-i1* (left), and schematic of the training paradigm (right; details as in Figure 3e).

Sample sizes are indicated within the figure. In (a) \* refers to  $P < 0.05/2$  and ns to  $P > 0.05/2$  in Mann-Whitney U-tests. In all other cases ns refers to  $P > 0.05$  in Kruskal-Wallis tests.

**e** Odor-arabinose/ Odor-sorbitol association

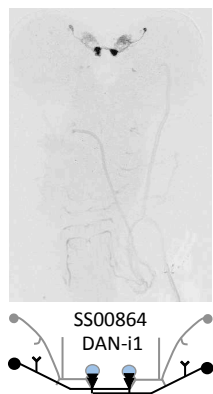

Odor  
Arabinose/Sorbitol reward

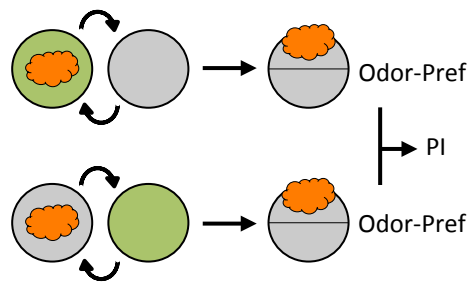

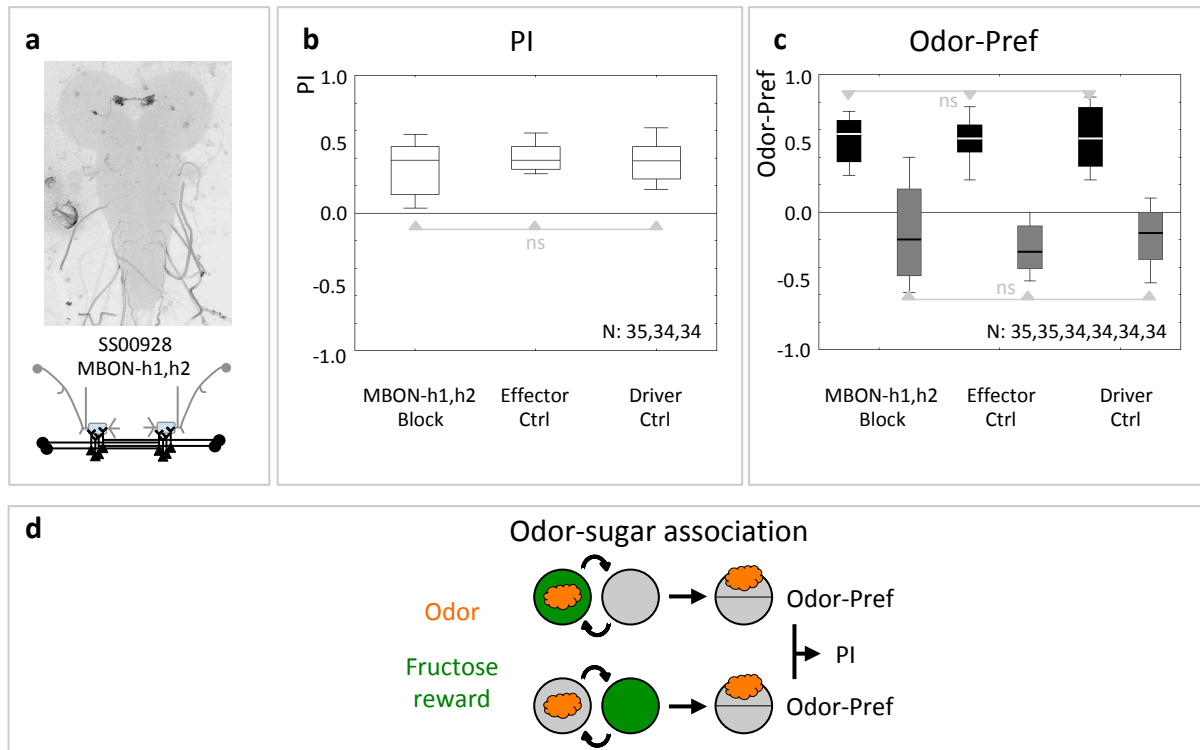

*Supplementary Figure 16: Silencing MBON-h1,h2 does not affect odor-fructose association - revisited*

(a-c) For an additional split-Gal4 strain covering the medial lobe shaft MBON double pair (MBON-h1,h2; SS00928), the panels show the expression pattern of the strain and a schematic overview of MBON-h1,h2 (a), the associative performance indices measuring odor-fructose reward memory (b), and the preference indices underlying these associative performance indices (c) upon silencing MBON-h1,h2 by means of *Kir2.1::GFP* expression.

(d) Schematic of the training paradigm (details as in Figure 3e).

Sample sizes are indicated within the figure. ns refers to  $P > 0.05$  in Kruskal-Wallis tests.

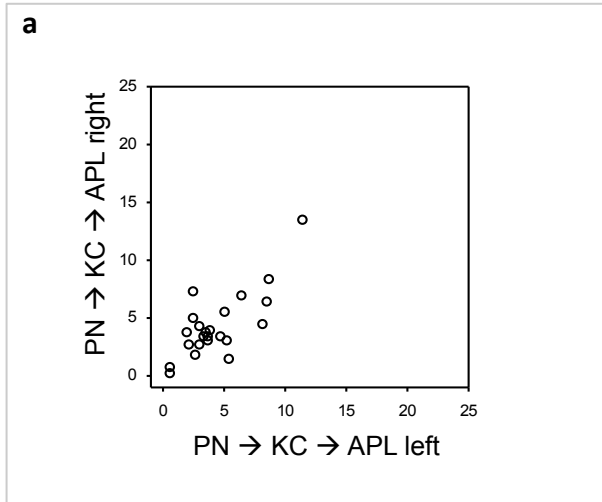

*Supplementary Figure 17: Connectivity of the APL neuron*  
 (a) The correlation of the PN-KC-APL matrix product shows that the right- and the left-hemisphere APL neuron sample the KC coding space in the same way, and in proportion to the fraction of PN-KC synapses that the respective PN class contributes (which is correlated between right and left hemisphere; not shown). The same correlation is found for the DAN-i1 neuron (Supplementary Fig. 13c). Correlations were determined with a Spearman rank correlation analysis at  $P < 0.05$ .

(b) Connectivity of the APL neuron with non-KCs. Fraction of the APL neurons' presynaptic partners as percent of the total amount of synaptic input to APL (top), and fraction of APLs' postsynaptic partners as percent of the total amount of synaptic output from APL (middle). Data are shown for the left (black) and right brain hemisphere (grey) separately. KCs contribute more than two thirds of the inputs to the APL neuron, which in turn dedicates about two thirds of its output to KCs. The bottom panel shows the connectivity of the APL neuron with DANs and MBONs. APL receives input from one vertical lobe DAN (DAN-f1) and one medial lobe DAN (DAN-k1) as well as from a vertical lobe MBON (MBON-q1, which was only found in stage 1 larvae: Figure S1 and Figure S2). The APL neuron delivers output to both calyx MBONs (MBON-a1 and MBON-a2). Indicated connections are axo-dendritic and shown as fractions of inputs onto the receiving neuron.

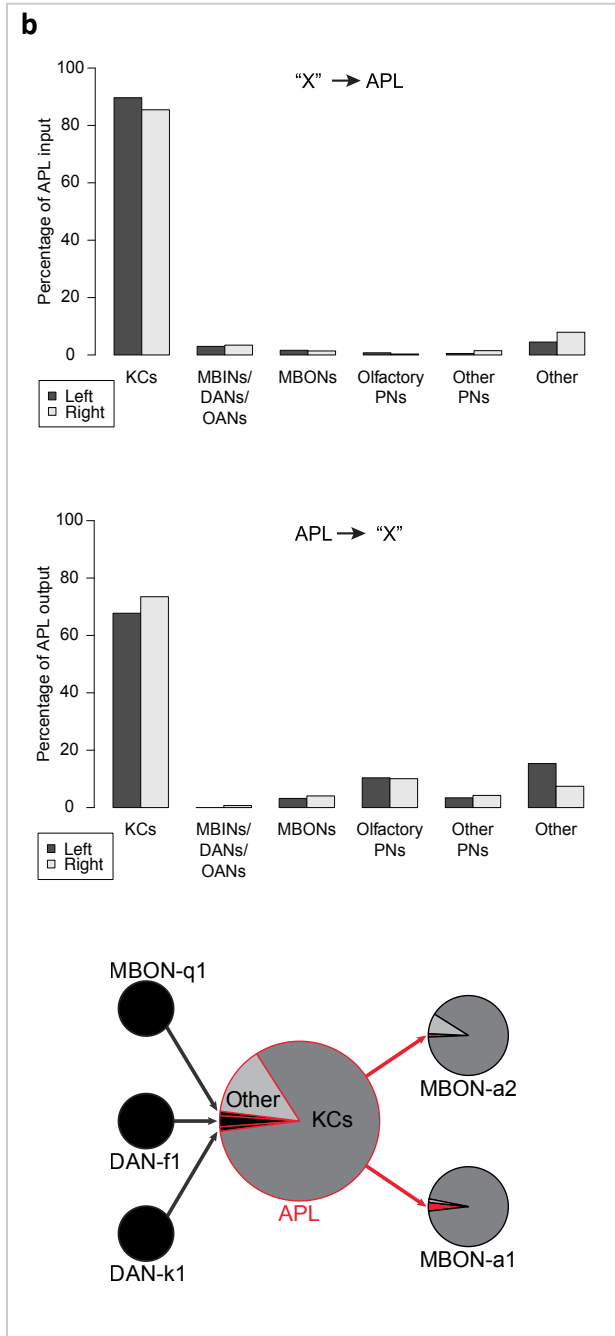

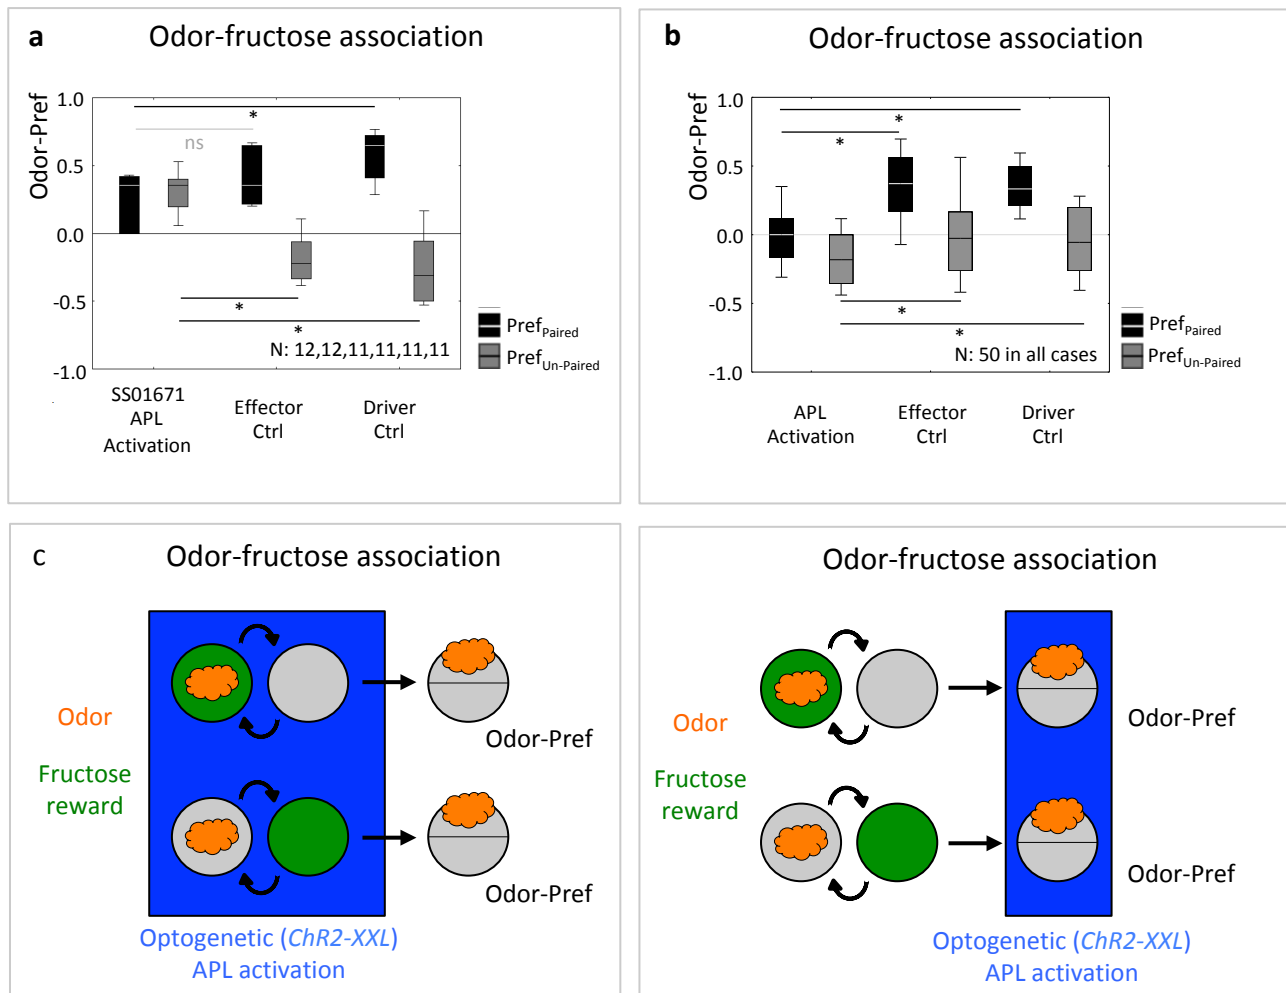

Supplementary Figure 18: Preference scores upon optogenetically activating the APL neuron during training only or during testing only

(a) Preference scores for the trained odor *n*-amylacetate (Odor-Pref) underlying the associative performance indices (PI) displayed in Figure 10c, regarding the optogenetic activation of the APL neuron during training only.

(b) Same as in (a), but for optogenetic activation of the APL neuron during testing only; data relate to the PI scores in Figure 10e.

(c and d) Schematics of the behavioral paradigms (details as in Figure 10d and f).

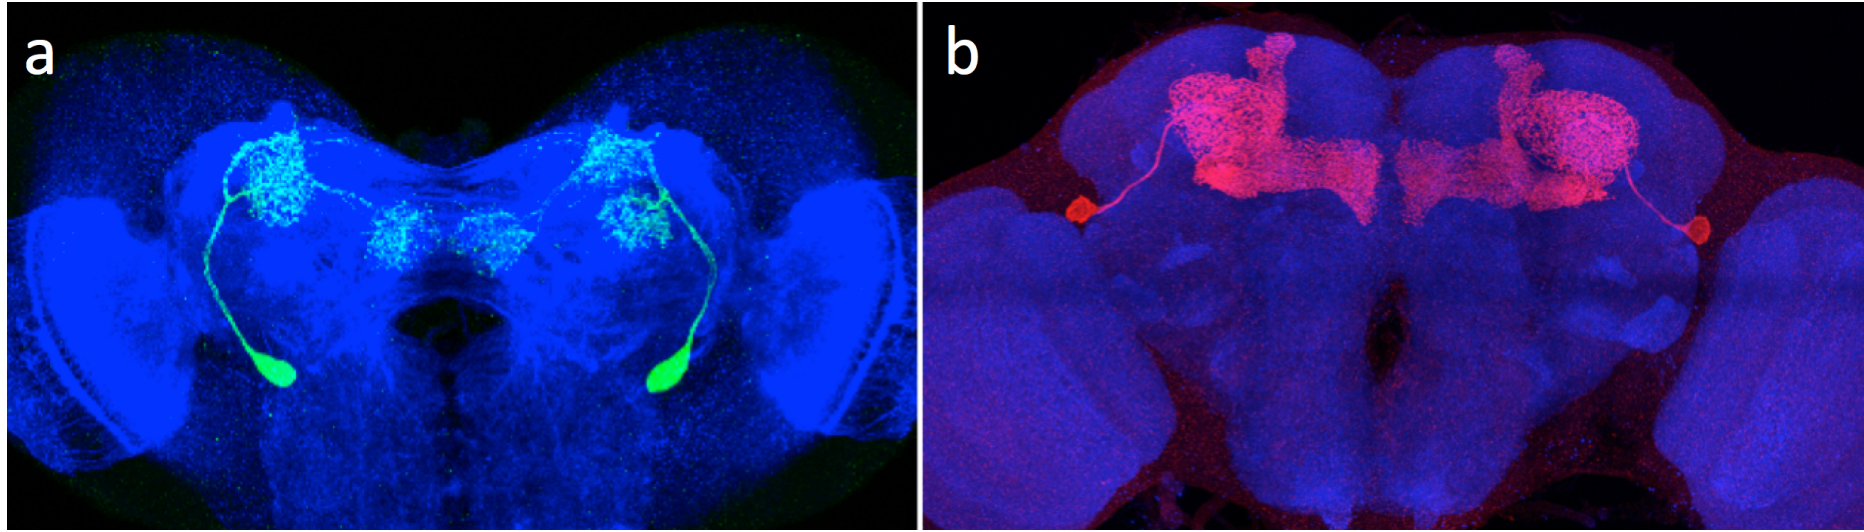

*Supplementary Figure 19: The APL neuron is remodeled and persists through metamorphosis*

(a) The APL neuron in the larva, revealed by anti-GFP staining (green) in offspring of a split-GAL4 driver strain expressing only in the APL neuron (GMR\_SS01671) crossed to *UAS-GFP* as the effector strain. Neuropil structure is revealed using anti- N-cadherin (blue).

(b) Transgene expression in the APL neuron was induced late in larval life and then maintained into adulthood using a technique based on (5). A conditional flippase (hPRFlp) is expressed from the GMR\_SS01671 split-Gal4 driver. The flippase is activated only late in the last larval stage by feeding larvae the progesterone mimic mifepristone (RU-486). The activated flippase removes a “stop” cassette from an actin-LexA driver, resulting in the constitutive expression of the tomato-RFP variant into the adult stage. To achieve this for the APL neuron, GMR\_SS01671 was crossed to the three-transgene strain pJFRC48-13XLexAop2-IVS-myrtTomato; Actin5Cp4.6>dsFRT>LexAp65; pJFRC108-20XUAS-IVS-hPRFlp-p10 respectively located to the attP8, attP5 and VK00005/ TM6 landing sites (available upon request). The image shows staining using anti-RFP (red); neuropil structure is revealed using anti- N-cadherin (blue).



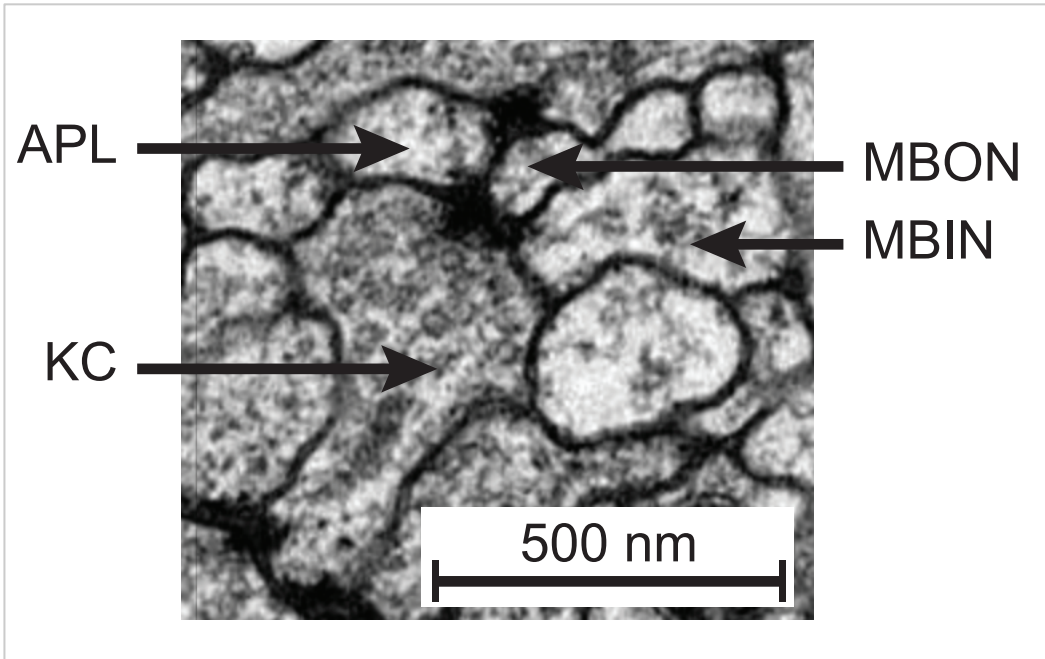

*Supplementary Figure 20: Example of a polyadic complex with KCs, MBINs, MBONs, and the APL neuron*  
Electron micrograph of a polyadic synaptic complex of a KC with the APL neuron, an MBIN and an MBON.

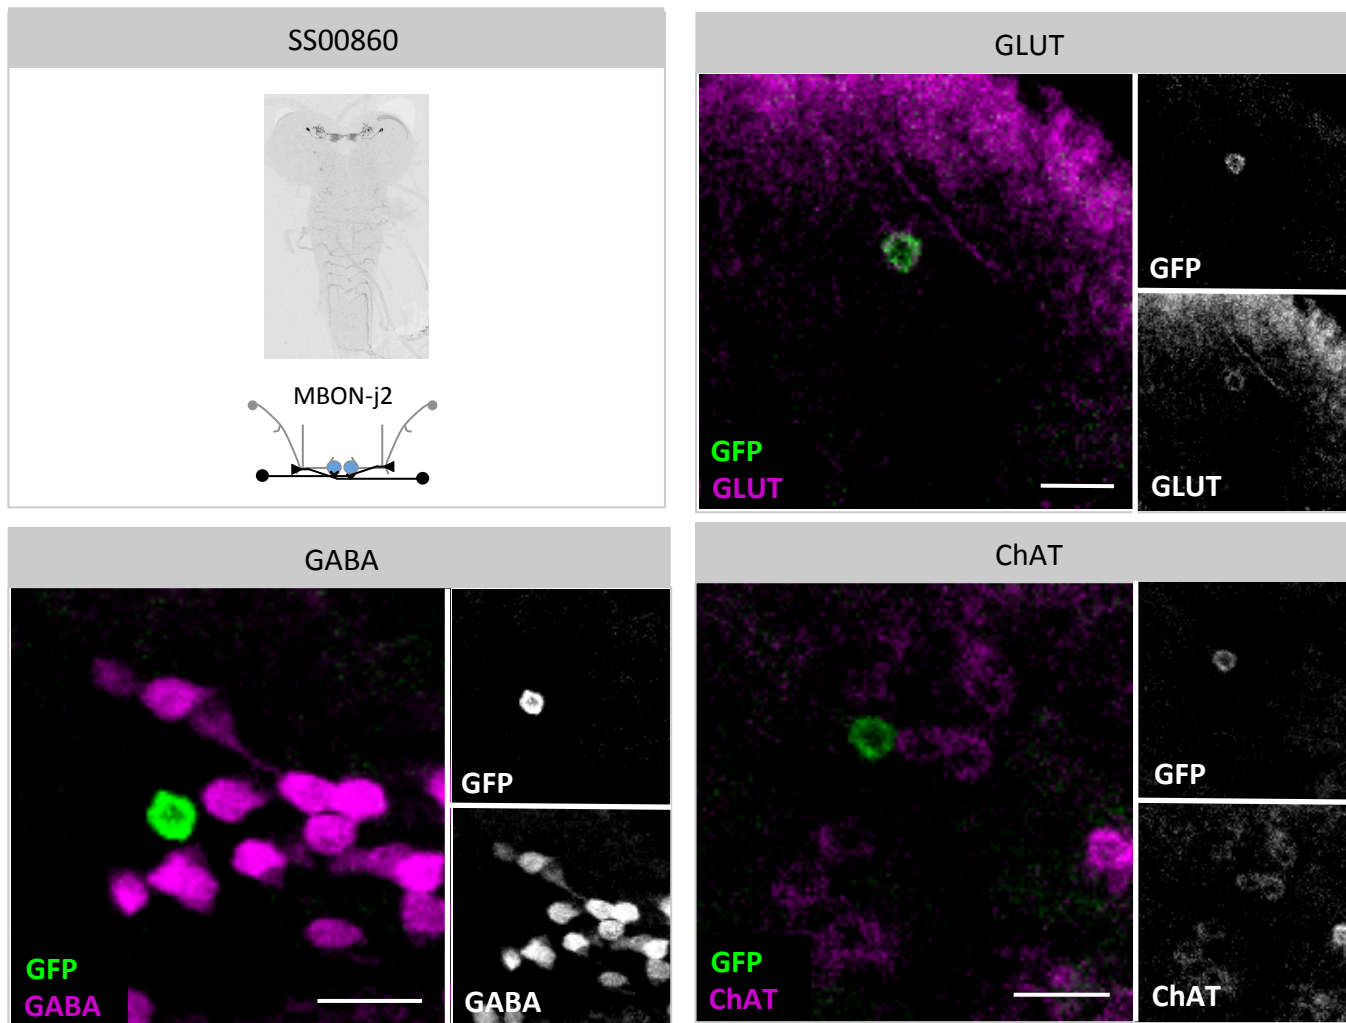

*Supplementary Figure 21: MBON-j2 is glutamatergic*

Testing for the neurotransmitter properties of MBON-j2 by immunohistochemistry. At the top left the expression pattern of the SS00860 split-Gal4 driver strain and a schematic of MBON-j2 is shown. In addition, double labeling of MBON-j2 by anti-GFP in green with staining respectively for anti-GLUT (GLUT: vesicular glutamate transporter; top right), anti-GABA (GABA: gamma aminobutyric acid; bottom left), and anti-ChAT (ChAT: choline acetyltransferase; bottom right) is shown in magenta. Insets show the respective staining separately in black and white. MBON-j2 only stains for anti-GLUT and is therefore regarded as glutamatergic. Scale bars: 5  $\mu$ m.

## Supplementary References

- 1 Eichler, K., Li, F., Litwin-Kumar, A., Park, Y., Andrade, I., Schneider-Mizell, C. M., Saumweber, T., Huser, A., Eschbach, C., Gerber, B., Fetter, R. D., Truman, J. W., Priebe, C. E., Abbott, L. F., Thum, A. S., Zlatic, M., and Cardona, A., The complete connectome of a learning and memory centre in an insect brain. *Nature* **548** (7666), 175-182 (2017).
- 2 Li, H. H., Kroll, J. R., Lennox, S. M., Ogundeyi, O., Jeter, J., Depasquale, G., and Truman, J. W., A GAL4 driver resource for developmental and behavioral studies on the larval CNS of *Drosophila*. *Cell Rep* **8** (3), 897-908 (2014).
- 3 Michels, B., Diegelmann, S., Tanimoto, H., Schwenkert, I., Buchner, E., and Gerber, B., A role for Synapsin in associative learning: the *Drosophila* larva as a study case. *Learn Mem* **12** (3), 224-231 (2005).
- 4 Saumweber, T., Weyhersmüller, A., Hallermann, S., Diegelmann, S., Michels, B., Bucher, D., Funk, N., Reisch, D., Krohne, G., Wegener, S., Buchner, E., and Gerber, B., Behavioral and synaptic plasticity are impaired upon lack of the synaptic protein SAP47. *J Neurosci* **31** (9), 3508-3518 (2011).
- 5 Harris, R. M., Pfeiffer, B. D., Rubin, G. M., and Truman, J. W., Neuron hemilineages provide the functional ground plan for the *Drosophila* ventral nervous system. *Elife* **4** (2015).
